# Supplementary material for: Selective detection of tyrosine-containing proximally phosphorylated motifs using an antenna-free Tb3+ luminescent sensor
Source: Royal Society of Chemistry journal article supplement (doi:10.1039/c5cc00679a), 2015-01-01
Supplement: c5cc00679a1.pdf [file c5cc00679a1.pdf]

Supplementary Information

**Selective detection of tyrosine-containing proximally phosphorylated motifs using  
an antenna-free Tb<sup>3+</sup> luminescent sensor**

Supplementary Information

Eugenia Duodu<sup>a</sup>, Dziyana Kraskouskaya<sup>a</sup>, Joshua Campbell<sup>a</sup>, Gustavo Graca-Lima<sup>a</sup>, and  
Patrick T. Gunning<sup>a</sup>

<sup>a</sup>University of Toronto Mississauga, 3359 Mississauga Road North, Mississauga,  
Ontario, Canada, L5L 1C6.  
patrick.gunning@utoronto.ca

**Table of contents**

**Supplementary figures:**

Figure S1: luminescence emission spectra of Tb<sup>3+</sup> with target di-phosphorylated peptide

Figure S2: titration of Tb<sup>3+</sup> with di-phosphorylated peptides.

Figure S3: detection limit of Tb<sup>3+</sup> with di-phosphorylated peptides.

Figure S4: Tb<sup>3+</sup> sensitivity towards target peptide in the presence of off-target competing  
phosphorylated species

**Supplementary tables:**

Table S1: list of human proteins containing pYpY motif

Table S2: Δ luminescence intensity of Tb<sup>3+</sup> in the presence of various analytes

Table S3: Δ luminescence intensity of Tb<sup>3+</sup> in the presence of various analyte  
combinations

**Supplementary notes**

Supplementary note 1: biophysical experiments

**Supplementary figures**

**Figure S1: luminescence emission spectra of  $Tb^{3+}$  with target di-phosphorylated peptide**

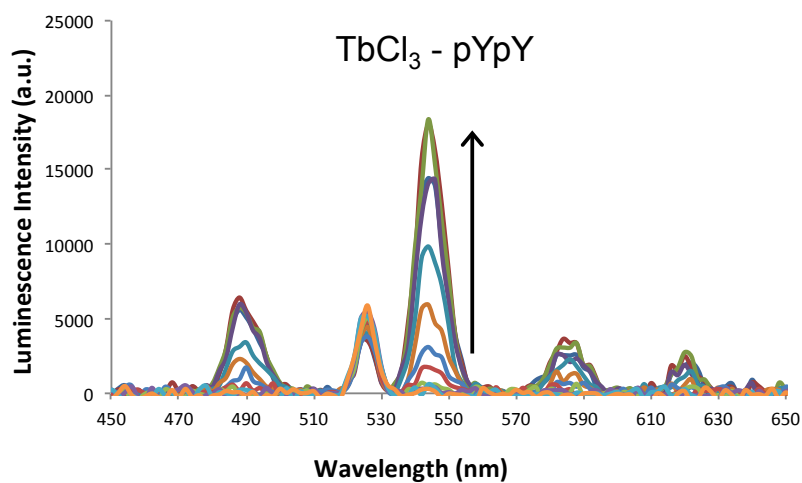

50  $\mu M$  of  $TbCl_3$  was titrated with 500-0.244  $\mu M$  of peptide and incubated for 30 min at r.t. Following incubation, the sample was excited at 263 nm and luminescence intensity was recorded from 450 nm to 650 nm in 2 nm steps (delay time = 60  $\mu s$ , integration time = 1.5 ms). The arrow on the graphs indicates increasing signal intensity with increasing peptide concentration. All samples were dissolved in 50 mM HEPES, 50 mM NaCl, pH 7.5 buffer.

**Figure S2: titration of  $Tb^{3+}$  with di-phosphorylated peptides.**

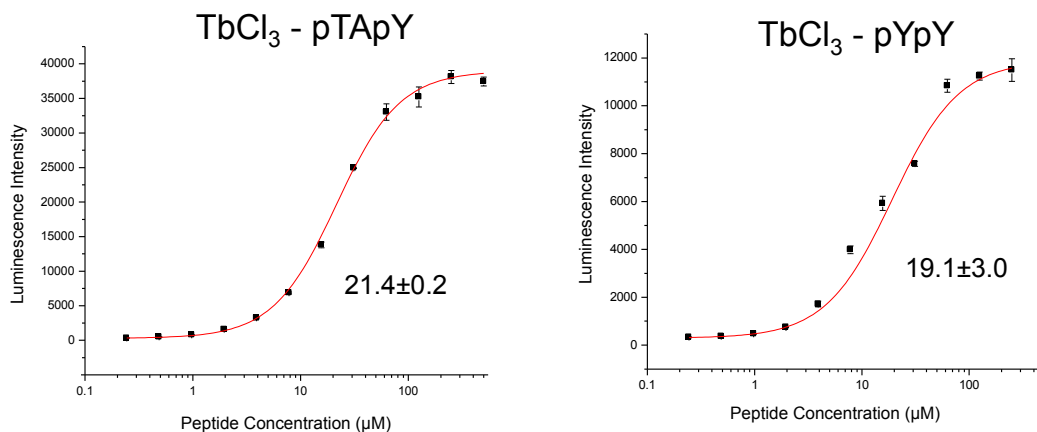

50  $\mu M$  of  $TbCl_3$  was titrated with 500-0.244  $\mu M$  of peptides and incubated for 30 min at r.t. Following incubation, samples were excited at 263 nm (10 nm bandwidth); the resultant luminescence intensity was recorded at 544 nm (20 nm bandwidth, 60  $\mu s$  delay time, 1.5 ms integration time). The titration data were fit to the Hill equation using Origin Software to derive apparent dissociation constants (displayed at the bottom of each graph in  $\mu M$ ). All samples were dissolved in 50 mM HEPES, 50 mM NaCl, pH 7.5 buffer.

**Figure S3: detection limit of  $Tb^{3+}$  with di-phosphorylated peptides.**

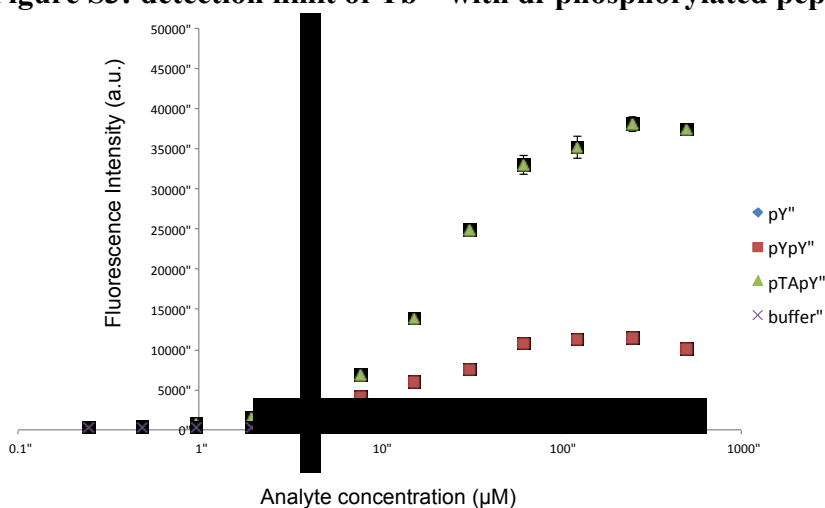

## Supplementary Information

50  $\mu\text{M}$  of  $\text{TbCl}_3$  was titrated with 500-0.244  $\mu\text{M}$  of peptides and incubated for 30 min at r.t. Following incubation, samples were excited at 263 nm (10 nm bandwidth); the resultant luminescence intensity was recorded at 544 nm (20 nm bandwidth, 60  $\mu\text{s}$  delay time, 1.5 ms integration time). Dashed lines indicates the  $\text{Tb}^{3+}$  ion limit of detection for target peptides, pTApY and pYpY as compared to the off-target mono-phosphorylated pY. All samples were dissolved in 50 mM HEPES, 50 mM NaCl, pH 7.5 buffer

**Figure S4:  $\text{Tb}^{3+}$  sensitivity towards target peptide in the presence of off-target competing phosphorylated species**

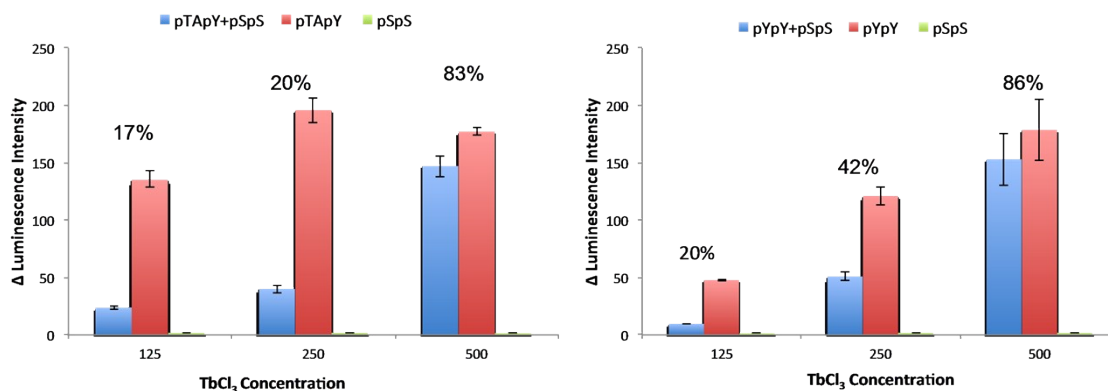

Variable concentrations of  $\text{TbCl}_3$  were added to peptide solutions (100  $\mu\text{M}$  of pTApY/pYpY; 200  $\mu\text{M}$  of pSpS) and incubated for 30 min at r.t. Following incubation, samples were excited at 263 nm (10 nm bandwidth); the resultant luminescence intensity was recorded at 544 nm (20 nm bandwidth, 60  $\mu\text{s}$  delay time, 1.5 ms integration time). Mean  $\Delta$  luminescence intensity (calculated as ratios of  $\text{Tb}^{3+}$  signal in the presence of analytes over  $\text{Tb}^{3+}$  signal in the absence of analytes) is reported with error bars representing  $\pm$  s.d. In order to quantify the effect of competing off-target species on the luminescence signal, we calculated the ratios of  $\Delta$  luminescence intensity for pTApY/pYpY alone and in the presence of the pSpS competing peptide (ratios are

## Supplementary Information

expressed as percentages on the graph).

### Supplementary tables

**Table S1: list of human proteins containing pYpY motif**

|    | Protein       | GeneSymbol | Accession   | MW     | Start | End  | Modification Sites |
|----|---------------|------------|-------------|--------|-------|------|--------------------|
| 1  | 14-3-3 eta    | YWHAH      | UP:Q04917   | 28219  | 130   | 131  | Y130-p, Y131-p     |
| 2  | 14-3-3 gamma  | YWHAG      | UP:P61981   | 28303  | 130   | 131  | Y130-p, Y131-p     |
| 3  | 14-3-3 sigma  | SFN        | UP:P31947   | 27774  | 127   | 128  | Y127-p, Y128-p     |
| 4  | 14-3-3 zeta   | YWHAZ      | UP:P63104   | 27745  | 125   | 126  | Y125-p, Y126-p     |
| 5  | 5-HT(1F)      | HTR1F      | UP:P30939   | 41709  | 201   | 202  | Y201-p, Y202-p     |
| 6  | AADAC         | AADAC      | UP:P22760   | 45734  | 17    | 18   | Y17-p, Y18-p       |
| 7  | ABCD3         | ABCD3      | UP:P28288   | 75476  | 635   | 636  | Y635-p, Y636-p     |
| 8  | ABHD1         | ABHD1      | UP:Q965E0   | 45207  | 304   | 305  | Y304-p, Y305-p     |
| 9  | ACADSB        | ACADSB     | UP:P45954   | 47485  | 198   | 199  | Y198-p, Y199-p     |
| 10 | ACADSB        | ACADSB     | UP:P45954   | 47485  | 372   | 373  | Y372-p, Y373-p     |
| 11 | Ack           | TNK2       | UP:Q07912   | 114569 | 859   | 860  | Y859-p, Y860-p     |
| 12 | ACP1          | ACP1       | UP:P24666   | 18042  | 132   | 133  | Y132-p, Y133-p     |
| 13 | ACSBG1        | ACSBG1     | UP:Q96GR2   | 81290  | 138   | 139  | Y138-p, Y139-p     |
| 14 | ACSF3         | ACSF3      | UP:Q4G176   | 64130  | 303   | 304  | Y303-p, Y304-p     |
| 15 | ACTN4         | ACTN4      | UP:O43707   | 104854 | 485   | 486  | Y485-p, Y486-p     |
| 16 | ADA           | ADA        | UP:P00813   | 40764  | 29    | 30   | Y29-p, Y30-p       |
| 17 | ADAMTS18      | ADAMTS18   | UP:Q8TE60   | 135167 | 764   | 765  | Y764-p, Y765-p     |
| 18 | ADFP          | PLIN2      | UP:Q99541   | 48075  | 216   | 217  | Y216-p, Y217-p     |
| 19 | ADPRH         | ADPRH      | UP:P54922   | 39507  | 19    | 20   | Y19-p, Y20-p       |
| 20 | Afadin        | MLLT4      | UP:P55196   | 206804 | 1656  | 1657 | Y1656-p, Y1657-p   |
| 21 | AFAP          | EQTN       | UP:Q9NQ60   | 32840  | 61    | 62   | Y61-p, Y62-p       |
| 22 | AFAP          | AFAP1      | UP:Q8N556   | 80725  | 93    | 94   | Y93-p, Y94-p       |
| 23 | AFAP1L1       | AFAP1L1    | UP:Q8TED9   | 86432  | 158   | 159  | Y158-p, Y159-p     |
| 24 | AGO3          | AGO3       | UP:Q9H9G7   | 97360  | 682   | 683  | Y682-p, Y683-p     |
| 25 | AIDA-1b iso2  | ANKS1B     | UP:Q7Z6G8-7 | 47104  | 14    | 15   | Y14-p, Y15-p       |
| 26 | AIP           | AIP        | UP:O00170   | 37636  | 247   | 248  | Y247-p, Y248-p     |
| 27 | AIP1          | MAGI2      | UP:Q86UL8   | 158754 | 365   | 366  | Y365-p, Y366-p     |
| 28 | AIP1          | AIP1       | UP:Q9NZN9   | 43903  | 267   | 268  | Y267-p, Y268-p     |
| 29 | AK2           | AK2        | UP:P54819   | 26478  | 200   | 201  | Y200-p, Y201-p     |
| 30 | AK5           | AK5        | UP:Q9Y6K8   | 63333  | 521   | 522  | Y521-p, Y522-p     |
| 31 | AK7           | AK7        | UP:Q96M32   | 82658  | 390   | 391  | Y390-p, Y391-p     |
| 32 | AKAP11        | AKAP11     | UP:Q9UKA4   | 210512 | 485   | 486  | Y485-p, Y486-p     |
| 33 | AKAP9         | AKAP9      | UP:Q99996   | 453667 | 1225  | 1226 | Y1225-p, Y1226-p   |
| 34 | Akt2          | AKT2       | UP:P31751   | 55769  | 177   | 178  | Y177-p, Y178-p     |
| 35 | ALDH2         | ALDH2      | UP:P05091   | 56381  | 148   | 149  | Y148-p, Y149-p     |
| 36 | ALK           | ALK        | UP:Q9UM73   | 176442 | 1282  | 1283 | Y1282-p, Y1283-p   |
| 37 | ALMS1         | ALMS1      | UP:Q8TCU4   | 460965 | 1939  | 1940 | Y1939-p, Y1940-p   |
| 38 | ALMS1         | ALMS1      | UP:Q8TCU4   | 460965 | 3276  | 3277 | Y3276-p, Y3277-p   |
| 39 | ALOX12B       | ALOX12B    | UP:O75342   | 80356  | 496   | 497  | Y496-p, Y497-p     |
| 40 | alphaSNBP(A)  | LSM14A     | UP:Q8ND56   | 50530  | 362   | 363  | Y362-p, Y363-p     |
| 41 | ALS2CR11 iso4 | ALS2CR11   | UP:Q53TS8-4 | 209056 | 1436  | 1437 | Y1436-p, Y1437-p   |
| 42 | AMICA1        | AMICA1     | UP:Q86YT9   | 44339  | 73    | 74   | Y73-p, Y74-p       |
| 43 | AMOTL1        | AMOTL1     | UP:Q8IY63   | 106574 | 218   | 219  | Y218-p, Y219-p     |
| 44 | AMPKA1        | PRKAA1     | UP:Q13131   | 64009  | 441   | 442  | Y441-p, Y442-p     |
| 45 | ANKLE2        | ANKLE2     | UP:Q86XL3   | 104114 | 199   | 200  | Y199-p, Y200-p     |
| 46 | ANKLE2        | ANKLE2     | UP:Q86XL3   | 104114 | 476   | 477  | Y476-p, Y477-p     |
| 47 | ANKRD11       | ANKRD11    | UP:Q6UB99   | 297913 | 213   | 214  | Y213-p, Y214-p     |
| 48 | ANKRD12       | ANKRD12    | UP:Q6UB98   | 235652 | 1863  | 1864 | Y1863-p, Y1864-p   |
| 49 | ANKRD31       | ANKRD31    | UP:Q8N7Z5   | 210816 | 681   | 682  | Y681-p, Y682-p     |
| 50 | ANTXR1        | ANTXR1     | UP:Q9H6X2   | 62789  | 132   | 133  | Y132-p, Y133-p     |
| 51 | ANTXR1        | ANTXR1     | UP:Q9H6X2   | 62789  | 382   | 383  | Y382-p, Y383-p     |
| 52 | ANTXR2        | ANTXR2     | UP:P58335   | 53666  | 380   | 381  | Y380-p, Y381-p     |
| 53 | ANXA2         | ANXA2      | UP:P07355   | 38604  | 316   | 317  | Y316-p, Y317-p     |

## Supplementary Information

|     |               |          |              |        |      |      |                  |
|-----|---------------|----------|--------------|--------|------|------|------------------|
| 54  | ANXA2         | ANXA2    | UP:P07355    | 38604  | 317  | 318  | Y317-p, Y318-p   |
| 55  | ANXA5         | ANXA5    | UP:P08758    | 35937  | 256  | 257  | Y256-p, Y257-p   |
| 56  | ANXA7         | ANXA7    | UP:P20073    | 52739  | 426  | 427  | Y426-p, Y427-p   |
| 57  | ANXA8         | ANXA8    | UP:P13928    | 36881  | 263  | 264  | Y263-p, Y264-p   |
| 58  | ANXA8L1       | ANXA8L1  | UP:Q5T2P8    | 36881  | 263  | 264  | Y263-p, Y264-p   |
| 59  | ANXA8L2       | ANXA8L1  | UP:Q5VT79    | 36865  | 263  | 264  | Y263-p, Y264-p   |
| 60  | AP2B1         | AP2B1    | UP:P63010    | 104553 | 276  | 277  | Y276-p, Y277-p   |
| 61  | AP4E1         | AP4E1    | UP:Q9UPM8    | 127287 | 830  | 831  | Y830-p, Y831-p   |
| 62  | APAF          | APAF1    | UP:Q14727    | 141840 | 382  | 383  | Y382-p, Y383-p   |
| 63  | APBA2         | APBA2    | UP:Q99767    | 82512  | 196  | 197  | Y196-p, Y197-p   |
| 64  | APOB          | APOB     | UP:P04114    | 515605 | 4025 | 4026 | Y4025-p, Y4026-p |
| 65  | APOBEC3G      | APOBEC3G | UP:Q9HC16    | 46408  | 181  | 182  | Y181-p, Y182-p   |
| 66  | AR            | AR       | UP:P10275    | 98989  | 362  | 363  | Y362-p, Y363-p   |
| 67  | ARAF          | ARAF     | UP:P10398    | 67585  | 301  | 302  | Y301-p, Y302-p   |
| 68  | ARHGAP1       | ARHGAP1  | UP:Q07960    | 50436  | 64   | 65   | Y64-p, Y65-p     |
| 69  | ARHGAP12      | ARHGAP12 | UP:Q8IWW6    | 96254  | 375  | 376  | Y375-p, Y376-p   |
| 70  | ARHGAP12      | ARHGAP12 | UP:Q8IWW6    | 96254  | 376  | 377  | Y376-p, Y377-p   |
| 71  | ARHGAP2       | CHN1     | UP:P15882    | 53172  | 45   | 46   | Y45-p, Y46-p     |
| 72  | ARHGEF33      | ARHGEF33 | UP:A8MVX0    | 94633  | 420  | 421  | Y420-p, Y421-p   |
| 73  | ARIH2         | ARIH2    | UP:Q95376    | 57819  | 337  | 338  | Y337-p, Y338-p   |
| 74  | ARIH2         | ARIH2    | UP:Q95376    | 57819  | 432  | 433  | Y432-p, Y433-p   |
| 75  | ARMETL1       | CDNF     | UP:Q49AH0    | 20964  | 83   | 84   | Y83-p, Y84-p     |
| 76  | ARPC3         | ARPC3    | UP:Q15145    | 20547  | 47   | 48   | Y47-p, Y48-p     |
| 77  | ARS2          | SRRT     | UP:Q9BXP5    | 100666 | 624  | 625  | Y624-p, Y625-p   |
| 78  | AS3MT         | AS3MT    | UP:Q9HBK9    | 41748  | 16   | 17   | Y16-p, Y17-p     |
| 79  | ASPM          | ASPM     | UP:Q8IZT6    | 409800 | 461  | 462  | Y461-p, Y462-p   |
| 80  | ASPM          | ASPM     | UP:Q8IZT6    | 409800 | 2675 | 2676 | Y2675-p, Y2676-p |
| 81  | ASPRV1        | ASPRV1   | UP:Q53RT3    | 36991  | 196  | 197  | Y196-p, Y197-p   |
| 82  | ATAD2         | ATAD2    | UP:Q6PL18    | 158554 | 304  | 305  | Y304-p, Y305-p   |
| 83  | ATG4B         | ATG4B    | UP:Q9Y4P1    | 44294  | 122  | 123  | Y122-p, Y123-p   |
| 84  | ATP12A        | ATP12A   | UP:P54707    | 115511 | 1038 | 1039 | Y1038-p, Y1039-p |
| 85  | ATP1A3        | ATP1A3   | UP:P13637    | 111749 | 548  | 549  | Y548-p, Y549-p   |
| 86  | ATP6V1A       | ATP6V1A  | UP:P38606    | 68304  | 464  | 465  | Y464-p, Y465-p   |
| 87  | ATP6V1E1      | ATP6V1E1 | UP:P36543    | 26145  | 56   | 57   | Y56-p, Y57-p     |
| 88  | ATP6V1E2      | ATP6V1E2 | UP:Q96A05    | 26074  | 56   | 57   | Y56-p, Y57-p     |
| 89  | ATP8B4        | ATP8B4   | UP:Q8TF62    | 135868 | 364  | 365  | Y364-p, Y365-p   |
| 90  | ATP9B         | ATP9B    | UP:Q43861    | 129304 | 25   | 26   | Y25-p, Y26-p     |
| 91  | ATP9B iso2    | ATP9B    | UP:Q43861-2  | 128198 | 25   | 26   | Y25-p, Y26-p     |
| 92  | ATRX          | ATRX     | UP:P46100    | 282586 | 203  | 204  | Y203-p, Y204-p   |
| 93  | axin 1        | AXIN1    | UP:Q15169    | 95635  | 787  | 788  | Y787-p, Y788-p   |
| 94  | AXL           | AXL      | UP:P30530    | 98336  | 702  | 703  | Y702-p, Y703-p   |
| 95  | BAG4          | BAG4     | UP:Q95429    | 49594  | 72   | 73   | Y72-p, Y73-p     |
| 96  | BAZ2B         | BAZ2B    | UP:Q9UIF8    | 240459 | 772  | 773  | Y772-p, Y773-p   |
| 97  | Bcl-3         | BCL3     | UP:P20749    | 47584  | 83   | 84   | Y83-p, Y84-p     |
| 98  | BCLAF1        | BCLAF1   | UP:Q9NYF8    | 106122 | 80   | 81   | Y80-p, Y81-p     |
| 99  | BICD1         | BICD1    | UP:Q96G01    | 110750 | 537  | 538  | Y537-p, Y538-p   |
| 100 | BICD2         | BICD2    | UP:Q8TD16    | 93533  | 424  | 425  | Y424-p, Y425-p   |
| 101 | BICD2         | BICD2    | UP:Q8TD16    | 93533  | 556  | 557  | Y556-p, Y557-p   |
| 102 | BLK           | BLK      | UP:P51451    | 57706  | 187  | 188  | Y187-p, Y188-p   |
| 103 | BMI1          | BMI1     | UP:P35226    | 36949  | 203  | 204  | Y203-p, Y204-p   |
| 104 | BRDT          | BRDT     | UP:Q58F21    | 107954 | 309  | 310  | Y309-p, Y310-p   |
| 105 | BTBD11        | BTBD11   | UP:A6QL63    | 120884 | 981  | 982  | Y981-p, Y982-p   |
| 106 | BTBD14A       | NACC2    | UP:Q96BF6    | 62837  | 223  | 224  | Y223-p, Y224-p   |
| 107 | Btk           | BTK      | UP:Q06187    | 76281  | 344  | 345  | Y344-p, Y345-p   |
| 108 | BTNL8         | BTNL8    | UP:Q6UX41    | 56748  | 121  | 122  | Y121-p, Y122-p   |
| 109 | C21orf59      | C21orf59 | UP:P57076    | 33224  | 245  | 246  | Y245-p, Y246-p   |
| 110 | C5orf49       | C5orf49  | UP:A4QMS7    | 16991  | 43   | 44   | Y43-p, Y44-p     |
| 111 | C5orf49       | C5orf49  | UP:A4QMS7    | 16991  | 44   | 45   | Y44-p, Y45-p     |
| 112 | C6orf132      | C6orf132 | UP:Q5T0Z8    | 124034 | 52   | 53   | Y52-p, Y53-p     |
| 113 | C6orf183      | C6orf183 | UP:Q5T699    | 46784  | 108  | 109  | Y108-p, Y109-p   |
| 114 | CACNA1G iso13 | CACNA1G  | UP:Q43497-13 | 250972 | 1575 | 1576 | Y1575-p, Y1576-p |
| 115 | CACNA1S       | CACNA1S  | UP:Q13698    | 212350 | 971  | 972  | Y971-p, Y972-p   |
| 116 | CACNA1S       | CACNA1S  | UP:Q13698    | 212350 | 972  | 973  | Y972-p, Y973-p   |
| 117 | CACNA2D1      | CACNA2D1 | UP:P54289    | 124568 | 217  | 218  | Y217-p, Y218-p   |
| 118 | CALCOCO2      | CALCOCO2 | UP:Q13137    | 52254  | 104  | 105  | Y104-p, Y105-p   |
| 119 | calpain 10    | CAPN10   | UP:Q9HC96    | 74952  | 465  | 466  | Y465-p, Y466-p   |
| 120 | calponin 1    | CNN1     | UP:P51911    | 33170  | 293  | 294  | Y293-p, Y294-p   |

## Supplementary Information

|     |                 |         |             |        |      |      |                  |
|-----|-----------------|---------|-------------|--------|------|------|------------------|
| 121 | calponin 2      | CNN2    | UP:Q99439   | 33697  | 302  | 303  | Y302-p, Y303-p   |
| 122 | calsequestrin 2 | CASQ2   | UP:O14958   | 46436  | 178  | 179  | Y178-p, Y179-p   |
| 123 | CAMK1D          | CAMK1D  | UP:Q8IU85   | 42914  | 152  | 153  | Y152-p, Y153-p   |
| 124 | CAPN7           | CAPN7   | UP:Q9Y6W3   | 92652  | 619  | 620  | Y619-p, Y620-p   |
| 125 | CASK            | CASK    | UP:O14936   | 105123 | 788  | 789  | Y788-p, Y789-p   |
| 126 | CASP5           | CASP5   | UP:P51878   | 49736  | 103  | 104  | Y103-p, Y104-p   |
| 127 | CBX4            | CBX4    | UP:O00257   | 61368  | 150  | 151  | Y150-p, Y151-p   |
| 128 | CBX4            | CBX4    | UP:O00257   | 61368  | 151  | 152  | Y151-p, Y152-p   |
| 129 | CCDC135         | CCDC135 | UP:Q8IY82   | 103497 | 551  | 552  | Y551-p, Y552-p   |
| 130 | CCDC174         | CCDC174 | UP:Q6PII3   | 53958  | 462  | 463  | Y462-p, Y463-p   |
| 131 | CCDC42          | CCDC42  | UP:Q96M95   | 38019  | 149  | 150  | Y149-p, Y150-p   |
| 132 | CCDC45          | CEP95   | UP:Q96GE4   | 95297  | 669  | 670  | Y669-p, Y670-p   |
| 133 | CCDC45          | CEP95   | UP:Q96GE4   | 95297  | 735  | 736  | Y735-p, Y736-p   |
| 134 | CCDC50          | CCDC50  | UP:Q8IVM0-2 | 56340  | 144  | 145  | Y144-p, Y145-p   |
| 135 | CCDC50          | CCDC50  | UP:Q8IVM0-2 | 56340  | 145  | 146  | Y145-p, Y146-p   |
| 136 | CCDC50 iso2     | CCDC50  | UP:Q8IVM0   | 35822  | 144  | 145  | Y144-p, Y145-p   |
| 137 | CCDC50 iso2     | CCDC50  | UP:Q8IVM0   | 35822  | 145  | 146  | Y145-p, Y146-p   |
| 138 | CCDC6           | CCDC6   | UP:Q16204   | 53291  | 392  | 393  | Y392-p, Y393-p   |
| 139 | CCDC99          | SPDL1   | UP:Q96EA4   | 70172  | 366  | 367  | Y366-p, Y367-p   |
| 140 | CD34            | CD34    | UP:P28906   | 40716  | 329  | 330  | Y329-p, Y330-p   |
| 141 | CD59            | CD59    | UP:P13987   | 14177  | 86   | 87   | Y86-p, Y87-p     |
| 142 | CDAN1           | CDAN1   | UP:Q8IWY9   | 134120 | 712  | 713  | Y712-p, Y713-p   |
| 143 | CDC23           | CDC23   | UP:Q9UJX2   | 68834  | 340  | 341  | Y340-p, Y341-p   |
| 144 | CDC27           | CDC27   | UP:P30260   | 91867  | 645  | 646  | Y645-p, Y646-p   |
| 145 | CDH1            | CDH1    | UP:P12830   | 97456  | 753  | 754  | Y753-p, Y754-p   |
| 146 | CDH1            | CDH1    | UP:P12830   | 97456  | 754  | 755  | Y754-p, Y755-p   |
| 147 | CDH10           | CDH10   | UP:Q9Y6N8   | 88451  | 360  | 361  | Y360-p, Y361-p   |
| 148 | CDH23           | CDH23   | UP:Q9H251   | 369494 | 3089 | 3090 | Y3089-p, Y3090-p |
| 149 | CDH3            | CDH3    | UP:P22223   | 91418  | 700  | 701  | Y700-p, Y701-p   |
| 150 | CELSR1          | CELSR1  | UP:Q9NYQ6   | 329486 | 282  | 283  | Y282-p, Y283-p   |
| 151 | CENPF           | CENPF   | UP:P49454   | 367764 | 158  | 159  | Y158-p, Y159-p   |
| 152 | CEP152          | CEP152  | UP:O94986   | 195626 | 1314 | 1315 | Y1314-p, Y1315-p |
| 153 | CEP78           | CEP78   | UP:Q5JTW2   | 76396  | 376  | 377  | Y376-p, Y377-p   |
| 154 | CGI-09          | TRMT6   | UP:Q9UJA5   | 55799  | 172  | 173  | Y172-p, Y173-p   |
| 155 | ChaK2           | TRPM6   | UP:Q9BX84   | 231708 | 782  | 783  | Y782-p, Y783-p   |
| 156 | CHD-2           | CHD2    | UP:O14647   | 211344 | 728  | 729  | Y728-p, Y729-p   |
| 157 | CHD-2           | CHD2    | UP:O14647   | 211344 | 1715 | 1716 | Y1715-p, Y1716-p |
| 158 | CHD-6           | CHD6    | UP:Q8TD26   | 305412 | 1237 | 1238 | Y1237-p, Y1238-p |
| 159 | CHD-7           | CHD7    | UP:Q9P2D1   | 335927 | 1217 | 1218 | Y1217-p, Y1218-p |
| 160 | CHD-9           | CHD9    | UP:Q3L8U1   | 326022 | 1635 | 1636 | Y1635-p, Y1636-p |
| 161 | CHD1L           | CHD1L   | UP:Q86WJ1   | 100984 | 289  | 290  | Y289-p, Y290-p   |
| 162 | CHGB            | CHGB    | UP:P05060   | 78276  | 525  | 526  | Y525-p, Y526-p   |
| 163 | CHST9           | CHST9   | UP:Q7L155   | 52055  | 429  | 430  | Y429-p, Y430-p   |
| 164 | CIRBP           | CIRBP   | UP:Q14011   | 18648  | 141  | 142  | Y141-p, Y142-p   |
| 165 | CKB             | CKB     | UP:P12277   | 42644  | 173  | 174  | Y173-p, Y174-p   |
| 166 | CKM             | CKM     | UP:P06732   | 43101  | 173  | 174  | Y173-p, Y174-p   |
| 167 | CKMT2           | CKMT2   | UP:P17540   | 47504  | 207  | 208  | Y207-p, Y208-p   |
| 168 | CKS1            | CKS1B   | UP:P61024   | 9660   | 7    | 8    | Y7-p, Y8-p       |
| 169 | CKS2            | CKS2    | UP:P33552   | 9860   | 7    | 8    | Y7-p, Y8-p       |
| 170 | Claudin-11      | CLDN11  | UP:O75508   | 21993  | 191  | 192  | Y191-p, Y192-p   |
| 171 | Claudin-2       | CLDN2   | UP:P57739   | 24549  | 194  | 195  | Y194-p, Y195-p   |
| 172 | Claudin-23      | CLDN23  | UP:Q96B33   | 31915  | 223  | 224  | Y223-p, Y224-p   |
| 173 | CLK3            | CLK3    | UP:P49761   | 73515  | 231  | 232  | Y231-p, Y232-p   |
| 174 | CLTA            | CLTA    | UP:P09496   | 27077  | 83   | 84   | Y83-p, Y84-p     |
| 175 | CLTC            | CLTC    | UP:Q00610   | 191615 | 899  | 900  | Y899-p, Y900-p   |
| 176 | CMSS1           | CMSS1   | UP:Q9BQ75   | 31884  | 102  | 103  | Y102-p, Y103-p   |
| 177 | CNBD1           | CNBD1   | UP:Q8NA66   | 50224  | 322  | 323  | Y322-p, Y323-p   |
| 178 | CNGA3           | CNGA3   | UP:Q16281   | 78838  | 168  | 169  | Y168-p, Y169-p   |
| 179 | CNNM2           | CNNM2   | UP:Q9H8M5   | 96623  | 712  | 713  | Y712-p, Y713-p   |
| 180 | CNNM2 iso4      | CNNM2   | UP:Q9H8M5-2 | 94341  | 712  | 713  | Y712-p, Y713-p   |
| 181 | CNNM4           | CNNM4   | UP:Q6P4Q7   | 86607  | 596  | 597  | Y596-p, Y597-p   |
| 182 | COL24A1         | COL24A1 | UP:Q17RW2   | 175496 | 472  | 473  | Y472-p, Y473-p   |
| 183 | COL24A1         | COL24A1 | UP:Q17RW2   | 175496 | 473  | 474  | Y473-p, Y474-p   |
| 184 | COP56           | COP56   | UP:Q7L5N1   | 36163  | 105  | 106  | Y105-p, Y106-p   |
| 185 | CPPED1          | CPPED1  | UP:Q9BRF8   | 35548  | 219  | 220  | Y219-p, Y220-p   |

## Supplementary Information

|     |             |           |             |        |      |      |                  |
|-----|-------------|-----------|-------------|--------|------|------|------------------|
| 186 | CPSF6       | CPSF6     | UP:Q16630   | 59210  | 520  | 521  | Y520-p, Y521-p   |
| 187 | CSPP1       | CSPP1     | UP:Q1MSJ5   | 145522 | 554  | 555  | Y554-p, Y555-p   |
| 188 | CST1        | CST1      | UP:P01037   | 16388  | 63   | 64   | Y63-p, Y64-p     |
| 189 | CTGLF3      | AGAP6     | UP:Q5VW22   | 73127  | 292  | 293  | Y292-p, Y293-p   |
| 190 | CTNND1      | CTNND1    | UP:O60716   | 108170 | 334  | 335  | Y334-p, Y335-p   |
| 191 | CTNND1 iso3 | CTNND1    | UP:O60716-3 | 104977 | 334  | 335  | Y334-p, Y335-p   |
| 192 | CTNND1 iso4 | CTNND1    | UP:O60716-4 | 105779 | 334  | 335  | Y334-p, Y335-p   |
| 193 | CYBA        | CYBA      | UP:P13498   | 21013  | 87   | 88   | Y87-p, Y88-p     |
| 194 | CYP7A1      | CYP7A1    | UP:P22680   | 57661  | 432  | 433  | Y432-p, Y433-p   |
| 195 | DAPK1       | DAPK1     | UP:P53355   | 160046 | 12   | 13   | Y12-p, Y13-p     |
| 196 | DAPK1       | DAPK1     | UP:P53355   | 160046 | 490  | 491  | Y490-p, Y491-p   |
| 197 | DDR1        | DDR1      | UP:Q08345   | 101128 | 796  | 797  | Y796-p, Y797-p   |
| 198 | DDR2        | DDR2      | UP:Q16832   | 96736  | 740  | 741  | Y740-p, Y741-p   |
| 199 | DDX26B      | DDX26B    | UP:Q5JSJ4   | 96673  | 426  | 427  | Y426-p, Y427-p   |
| 200 | DDX6        | DDX6      | UP:P26196   | 54417  | 312  | 313  | Y312-p, Y313-p   |
| 201 | DDX9        | DHX9      | UP:Q08211   | 140958 | 148  | 149  | Y148-p, Y149-p   |
| 202 | Desmoplakin | DSP       | UP:P15924   | 331774 | 41   | 42   | Y41-p, Y42-p     |
| 203 | DHX36       | DHX36     | UP:Q9H2U1   | 114760 | 1006 | 1007 | Y1006-p, Y1007-p |
| 204 | Diminuto    | DHCR24    | UP:Q15392   | 60101  | 299  | 300  | Y299-p, Y300-p   |
| 205 | DLG5        | DLG5      | UP:Q8TDM6   | 213868 | 1077 | 1078 | Y1077-p, Y1078-p |
| 206 | DNAH1       | DNAH1     | UP:Q9P2D7   | 493953 | 1525 | 1526 | Y1525-p, Y1526-p |
| 207 | DNAH3       | DNAH3     | UP:Q8TD57   | 470771 | 2639 | 2640 | Y2639-p, Y2640-p |
| 208 | DNAH5       | DNAH5     | UP:Q8TE73   | 529021 | 83   | 84   | Y83-p, Y84-p     |
| 209 | DNAH6       | DNAH6     | UP:Q9C0G6   | 475983 | 2660 | 2661 | Y2660-p, Y2661-p |
| 210 | DNAJA1      | DNAJA1    | UP:P31689   | 44868  | 7    | 8    | Y7-p, Y8-p       |
| 211 | DNAJA3      | DNAJA3    | UP:Q96EY1   | 52489  | 113  | 114  | Y113-p, Y114-p   |
| 212 | DNAJC7      | DNAJC7    | UP:Q99615   | 56441  | 50   | 51   | Y50-p, Y51-p     |
| 213 | DNMBP       | DNMBP     | UP:Q6XZF7   | 177347 | 429  | 430  | Y429-p, Y430-p   |
| 214 | DOCK10      | DOCK10    | UP:Q96BY6   | 249531 | 1853 | 1854 | Y1853-p, Y1854-p |
| 215 | DOCK2       | DOCK2     | UP:Q92608   | 211948 | 481  | 482  | Y481-p, Y482-p   |
| 216 | DPP10       | DPP10     | UP:Q8N608   | 90888  | 319  | 320  | Y319-p, Y320-p   |
| 217 | DPP6        | DPP6      | UP:P42658   | 97588  | 263  | 264  | Y263-p, Y264-p   |
| 218 | DPY19L4     | DPY19L4   | UP:Q7Z388   | 83756  | 99   | 100  | Y99-p, Y100-p    |
| 219 | DSCAML1     | DSCAML1   | UP:Q8TD84   | 224463 | 533  | 534  | Y533-p, Y534-p   |
| 220 | DUSP7       | DUSP7     | UP:Q16829   | 44957  | 169  | 170  | Y169-p, Y170-p   |
| 221 | dynactin 4  | DCTN4     | UP:Q9UJW0   | 52337  | 107  | 108  | Y107-p, Y108-p   |
| 222 | DYNC2H1     | DYNC2H1   | UP:Q8NCM8   | 492622 | 799  | 800  | Y799-p, Y800-p   |
| 223 | DYNC2H1     | DYNC2H1   | UP:Q8NCM8   | 492622 | 2230 | 2231 | Y2230-p, Y2231-p |
| 224 | DYRK1A      | DYRK1A    | UP:Q13627   | 85584  | 111  | 112  | Y111-p, Y112-p   |
| 225 | DYRK1B      | DYRK1B    | UP:Q9Y463   | 69198  | 63   | 64   | Y63-p, Y64-p     |
| 226 | E2A         | TCF3      | UP:P15923   | 67600  | 149  | 150  | Y149-p, Y150-p   |
| 227 | EDEM3       | EDEM3     | UP:Q9BZQ6   | 104664 | 295  | 296  | Y295-p, Y296-p   |
| 228 | EDRF1       | C10orf137 | UP:Q3B7T1   | 138528 | 696  | 697  | Y696-p, Y697-p   |
| 229 | eEF1A1      | EEF1A1    | UP:P68104   | 50141  | 85   | 86   | Y85-p, Y86-p     |
| 230 | eEF2K       | EEF2K     | UP:O00418   | 82144  | 59   | 60   | Y59-p, Y60-p     |
| 231 | EFCAB13     | EFCAB13   | UP:Q8IY85   | 110129 | 345  | 346  | Y345-p, Y346-p   |
| 232 | EFG1        | GFM1      | UP:Q96RP9   | 83471  | 68   | 69   | Y68-p, Y69-p     |
| 233 | EFHB        | EFHB      | UP:Q8N7U6   | 93802  | 697  | 698  | Y697-p, Y698-p   |
| 234 | EFNB1       | EFNB1     | UP:P98172   | 38007  | 343  | 344  | Y343-p, Y344-p   |
| 235 | EFNB2       | EFNB2     | UP:P52799   | 36923  | 330  | 331  | Y330-p, Y331-p   |
| 236 | EFNB3       | EFNB3     | UP:Q15768   | 35835  | 337  | 338  | Y337-p, Y338-p   |
| 237 | EGFR        | EGFR      | UP:P00533   | 134277 | 112  | 113  | Y112-p, Y113-p   |
| 238 | EHHADH      | EHHADH    | UP:Q08426   | 79495  | 682  | 683  | Y682-p, Y683-p   |
| 239 | eIF2A       | EIF2A     | UP:Q9BY44   | 64990  | 250  | 251  | Y250-p, Y251-p   |
| 240 | eIF3S6IP    | EIF3L     | UP:Q9Y262   | 66727  | 287  | 288  | Y287-p, Y288-p   |
| 241 | eIF4G       | EIF4G1    | UP:Q04637   | 175491 | 103  | 104  | Y103-p, Y104-p   |
| 242 | ELMO2       | ELMO2     | UP:Q96JJ3   | 82615  | 48   | 49   | Y48-p, Y49-p     |
| 243 | ELTD1       | ELTD1     | UP:Q9HBW9   | 77811  | 301  | 302  | Y301-p, Y302-p   |
| 244 | emerin      | EMD       | UP:P50402   | 28994  | 94   | 95   | Y94-p, Y95-p     |
| 245 | emerin      | EMD       | UP:P50402   | 28994  | 181  | 182  | Y181-p, Y182-p   |
| 246 | EPC2        | EPC2      | UP:Q52LR7   | 91095  | 408  | 409  | Y408-p, Y409-p   |
| 247 | EphA3       | EPHA3     | UP:P29320   | 110131 | 123  | 124  | Y123-p, Y124-p   |
| 248 | EphA7       | EPHA7     | UP:Q15375   | 112097 | 201  | 202  | Y201-p, Y202-p   |
| 249 | EphB6       | EPHB6     | UP:O15197   | 110700 | 644  | 645  | Y644-p, Y645-p   |
| 250 | ephexin-1   | NGEF      | UP:Q8N5V2   | 82496  | 288  | 289  | Y288-p, Y289-p   |



## Supplementary Information

|     |               |                                             |             |        |      |      |                  |
|-----|---------------|---------------------------------------------|-------------|--------|------|------|------------------|
| 251 | eplin         | LIMA1                                       | UP:Q9UHB6   | 85226  | 751  | 752  | Y751-p, Y752-p   |
| 252 | ERK3          | MAPK6                                       | UP:Q16659   | 82681  | 467  | 468  | Y467-p, Y468-p   |
| 253 | EST1A         | SMG6                                        | UP:Q86US8   | 160462 | 508  | 509  | Y508-p, Y509-p   |
| 254 | EST1A         | SMG6                                        | UP:Q86US8   | 160462 | 788  | 789  | Y788-p, Y789-p   |
| 255 | esterase D    | ESD                                         | UP:P10768   | 31463  | 262  | 263  | Y262-p, Y263-p   |
| 256 | ESYT1         | ESYT1                                       | UP:Q9BSJ8   | 122856 | 981  | 982  | Y981-p, Y982-p   |
| 257 | EXOC4         | EXOC4                                       | UP:Q96A65   | 110498 | 898  | 899  | Y898-p, Y899-p   |
| 258 | FAK           | PTK2                                        | UP:Q05397   | 119233 | 576  | 577  | Y576-p, Y577-p   |
| 259 | FALZ          | BPTF                                        | UP:Q12830   | 338262 | 2985 | 2986 | Y2985-p, Y2986-p |
| 260 | FAM111B       | FAM111B                                     | UP:Q6SJ93   | 84674  | 348  | 349  | Y348-p, Y349-p   |
| 261 | FAM120A       | FAM120A                                     | UP:Q9NZB2   | 121888 | 327  | 328  | Y327-p, Y328-p   |
| 262 | FAM120A       | FAM120A                                     | UP:Q9NZB2   | 121888 | 1003 | 1004 | Y1003-p, Y1004-p |
| 263 | FAM177A1      | FAM177A1                                    | UP:Q8N128   | 23757  | 139  | 140  | Y139-p, Y140-p   |
| 264 | FAM44A        | BOD1L1                                      | UP:Q8NFC6   | 330466 | 480  | 481  | Y480-p, Y481-p   |
| 265 | FAM82A1       | FAM82A1                                     | UP:Q96LZ7   | 47399  | 306  | 307  | Y306-p, Y307-p   |
| 266 | FAM84A        | FAM84A                                      | UP:Q96KN4   | 32491  | 243  | 244  | Y243-p, Y244-p   |
| 267 | FASN          | FASN                                        | UP:P49327   | 273427 | 2424 | 2425 | Y2424-p, Y2425-p |
| 268 | FBP1          | FUBP1                                       | UP:Q96AE4   | 67560  | 589  | 590  | Y589-p, Y590-p   |
| 269 | FBP1          | FUBP1                                       | UP:Q96AE4   | 67560  | 618  | 619  | Y618-p, Y619-p   |
| 270 | FBP1          | FUBP1                                       | UP:Q96AE4   | 67560  | 625  | 626  | Y625-p, Y626-p   |
| 271 | FBXO9         | FBXO9                                       | UP:Q9UK97   | 52329  | 296  | 297  | Y296-p, Y297-p   |
| 272 | FCGR1A        | FCGR1A                                      | UP:P12314   | 42632  | 137  | 138  | Y137-p, Y138-p   |
| 273 | FcRL3         | FCRL3                                       | UP:Q96P31   | 80856  | 133  | 134  | Y133-p, Y134-p   |
| 274 | Fer           | FER                                         | UP:P16591   | 94638  | 199  | 200  | Y199-p, Y200-p   |
| 275 | FFR           | VPSS1                                       | UP:Q9UID3   | 86042  | 40   | 41   | Y40-p, Y41-p     |
| 276 | FGFR1         | FGFR1                                       | UP:P11362   | 91868  | 653  | 654  | Y653-p, Y654-p   |
| 277 | FGFR2         | FGFR2                                       | UP:P21802   | 92025  | 656  | 657  | Y656-p, Y657-p   |
| 278 | FGFR3         | FGFR3                                       | UP:P22607   | 87710  | 647  | 648  | Y647-p, Y648-p   |
| 279 | FGFR4         | FGFR4                                       | UP:P22455   | 87954  | 642  | 643  | Y642-p, Y643-p   |
| 280 | FGG           | FGG                                         | UP:P02679   | 51512  | 374  | 375  | Y374-p, Y375-p   |
| 281 | Fgr           | FGR                                         | UP:P09769   | 59479  | 208  | 209  | Y208-p, Y209-p   |
| 282 | FH            | FH                                          | UP:P07954   | 54637  | 67   | 68   | Y67-p, Y68-p     |
| 283 | FHL1 iso1     | FHL1                                        | UP:Q13642-1 | 31895  | 207  | 208  | Y207-p, Y208-p   |
| 284 | FIP1L1        | FIP1L1                                      | UP:Q6UN15   | 66526  | 453  | 454  | Y453-p, Y454-p   |
| 285 | FLG           | FLG                                         | UP:P20930   | 435170 | 85   | 86   | Y85-p, Y86-p     |
| 286 | Fli1          | FLI1                                        | UP:Q01543   | 50982  | 451  | 452  | Y451-p, Y452-p   |
| 287 | FNDC1         | FNDC1                                       | UP:Q4ZHG4   | 205558 | 1878 | 1879 | Y1878-p, Y1879-p |
| 288 | FNDC1         | FNDC1                                       | UP:Q4ZHG4   | 205558 | 1879 | 1880 | Y1879-p, Y1880-p |
| 289 | FOXK1         | FOXK1                                       | UP:P85037   | 75457  | 341  | 342  | Y341-p, Y342-p   |
| 290 | FRAS1         | FRAS1                                       | UP:Q86XX4   | 443214 | 3090 | 3091 | Y3090-p, Y3091-p |
| 291 | FRMPD1        | FRMPD1                                      | UP:Q5SYB0   | 173437 | 868  | 869  | Y868-p, Y869-p   |
| 292 | FUT3          | FUT3                                        | UP:P21217   | 42117  | 209  | 210  | Y209-p, Y210-p   |
| 293 | FUT5          | FUT5                                        | UP:Q11128   | 43008  | 222  | 223  | Y222-p, Y223-p   |
| 294 | FUT6          | FUT6                                        | UP:P51993   | 41860  | 208  | 209  | Y208-p, Y209-p   |
| 295 | Fyn           | FYN                                         | UP:P06241   | 60762  | 213  | 214  | Y213-p, Y214-p   |
| 296 | G2            | KIAA1549L                                   | UP:Q6ZVL6   | 198999 | 1417 | 1418 | Y1417-p, Y1418-p |
| 297 | G3BP-2        | G3BP2                                       | UP:Q9UN86   | 54121  | 175  | 176  | Y175-p, Y176-p   |
| 298 | Gab1          | GAB1                                        | UP:Q13480   | 76616  | 47   | 48   | Y47-p, Y48-p     |
| 299 | Gab2          | GAB2                                        | UP:Q9UQC2   | 74458  | 48   | 49   | Y48-p, Y49-p     |
| 300 | GABPA         | GABPA                                       | UP:Q06546   | 51295  | 380  | 381  | Y380-p, Y381-p   |
| 301 | GABPA         | GABPA                                       | UP:Q06546   | 51295  | 381  | 382  | Y381-p, Y382-p   |
| 302 | GAGE1         | GAGE1                                       | UP:Q13065   | 15610  | 9    | 10   | Y9-p, Y10-p      |
| 303 | GAGE12B/C/D/E | GAGE12B;<br>GAGE12C;<br>GAGE12D;<br>GAGE12E | UP:A1L429   | 12925  | 9    | 10   | Y9-p, Y10-p      |
| 304 | GAGE12F       | GAGE12F                                     | UP:POCL80   | 12978  | 9    | 10   | Y9-p, Y10-p      |
| 305 | GAGE12G       |                                             | UP:POCL81   | 12978  | 9    | 10   | Y9-p, Y10-p      |
| 306 | GAGE12H       | GAGE12H                                     | UP:A6NDE8   | 12924  | 9    | 10   | Y9-p, Y10-p      |
| 307 | GAGE12I       | GAGE12I                                     | UP:POCL82   | 12978  | 9    | 10   | Y9-p, Y10-p      |
| 308 | GAGE12J       | GAGE12J                                     | UP:A6NER3   | 12896  | 9    | 10   | Y9-p, Y10-p      |
| 309 | GAGE3         | GAGE3                                       | UP:Q13067   | 12937  | 10   | 11   | Y10-p, Y11-p     |
| 310 | GAGE4         | GAGE4                                       | UP:Q13068   | 12885  | 9    | 10   | Y9-p, Y10-p      |
| 311 | GAGE5         | GAGE5                                       | UP:Q13069   | 12924  | 9    | 10   | Y9-p, Y10-p      |
| 312 | GAGE6         | GAGE6                                       | UP:Q13070   | 12892  | 9    | 10   | Y9-p, Y10-p      |

## Supplementary Information

|     |                  |           |             |        |      |      |                  |
|-----|------------------|-----------|-------------|--------|------|------|------------------|
| 313 | GAGE7            | GAGE7     | UP:Q76087   | 12978  | 9    | 10   | Y9-p, Y10-p      |
| 314 | GALNT10          | GALNT10   | UP:Q86SR1   | 68992  | 293  | 294  | Y293-p, Y294-p   |
| 315 | GAMT             | GAMT      | UP:Q14353   | 26318  | 222  | 223  | Y222-p, Y223-p   |
| 316 | GAREM iso3       | GAREM     | UP:Q9H706-3 | 97099  | 570  | 571  | Y570-p, Y571-p   |
| 317 | GATA1            | GATA1     | UP:P15976   | 42751  | 285  | 286  | Y285-p, Y286-p   |
| 318 | GBP6             | GBP6      | UP:Q6ZM66   | 72427  | 333  | 334  | Y333-p, Y334-p   |
| 319 | GCET2            | GCSAM     | UP:Q8N6F7   | 21005  | 106  | 107  | Y106-p, Y107-p   |
| 320 | GCHFR            | GCHFR     | UP:P30047   | 9698   | 47   | 48   | Y47-p, Y48-p     |
| 321 | GCM2             | GCM2      | UP:Q75603   | 56610  | 359  | 360  | Y359-p, Y360-p   |
| 322 | GCP3             | TUBGCP3   | UP:Q96CW5   | 103571 | 131  | 132  | Y131-p, Y132-p   |
| 323 | GCP3             | TUBGCP3   | UP:Q96CW5   | 103571 | 132  | 133  | Y132-p, Y133-p   |
| 324 | GDAP2            | GDAP2     | UP:Q9NXXN4  | 56225  | 487  | 488  | Y487-p, Y488-p   |
| 325 | GK2              | GK2       | UP:Q14410   | 60594  | 315  | 316  | Y315-p, Y316-p   |
| 326 | GLDN             | GLDN      | UP:Q6ZMI3   | 58957  | 382  | 383  | Y382-p, Y383-p   |
| 327 | GLT1             | SLC1A2    | UP:P43004   | 62104  | 123  | 124  | Y123-p, Y124-p   |
| 328 | GLT25D2          | GLT25D2   | UP:Q8IYK4   | 72924  | 541  | 542  | Y541-p, Y542-p   |
| 329 | GMD              | GMDS      | UP:Q60547   | 41950  | 323  | 324  | Y323-p, Y324-p   |
| 330 | GNL2             | GNL2      | UP:Q13823   | 83655  | 698  | 699  | Y698-p, Y699-p   |
| 331 | GNMT             | GNMT      | UP:Q14749   | 32742  | 196  | 197  | Y196-p, Y197-p   |
| 332 | GNPNAT1          | GNPNAT1   | UP:Q96EK6   | 20749  | 84   | 85   | Y84-p, Y85-p     |
| 333 | GPD2             | GPD2      | UP:P43304   | 80853  | 600  | 601  | Y600-p, Y601-p   |
| 334 | GP1bA            | GP1BA     | UP:P07359   | 71540  | 294  | 295  | Y294-p, Y295-p   |
| 335 | GPR161           | GPR161    | UP:Q8N6U8   | 58559  | 344  | 345  | Y344-p, Y345-p   |
| 336 | GPR68            | GPR68     | UP:Q15743   | 41077  | 187  | 188  | Y187-p, Y188-p   |
| 337 | GPSM1            | GPSM1     | UP:Q86YR5   | 74510  | 271  | 272  | Y271-p, Y272-p   |
| 338 | GRHL1            | GRHL1     | UP:Q9NZI5   | 70113  | 67   | 68   | Y67-p, Y68-p     |
| 339 | GRHL2            | GRHL2     | UP:Q6ISB3   | 71105  | 70   | 71   | Y70-p, Y71-p     |
| 340 | GRP94            | HSP90B1   | UP:P14625   | 92469  | 677  | 678  | Y677-p, Y678-p   |
| 341 | GSE1             | GSE1      | UP:Q14687   | 136164 | 755  | 756  | Y755-p, Y756-p   |
| 342 | GSE1             | GSE1      | UP:Q14687   | 136164 | 756  | 757  | Y756-p, Y757-p   |
| 343 | GSK3A            | GSK3A     | UP:P49840   | 50981  | 284  | 285  | Y284-p, Y285-p   |
| 344 | GSK3B            | GSK3B     | UP:P49841   | 46744  | 221  | 222  | Y221-p, Y222-p   |
| 345 | GTF2E1           | GTF2E1    | UP:P29083   | 49452  | 91   | 92   | Y91-p, Y92-p     |
| 346 | GTF2F2           | GTF2F2    | UP:P13984   | 28380  | 196  | 197  | Y196-p, Y197-p   |
| 347 | GTF2I            | GTF2I     | UP:P78347   | 112416 | 248  | 249  | Y248-p, Y249-p   |
| 348 | GTF2I iso2       | GTF2I     | UP:P78347-2 | 107970 | 248  | 249  | Y248-p, Y249-p   |
| 349 | GTSE1            | GTSE1     | UP:Q9NYZ3   | 76645  | 147  | 148  | Y147-p, Y148-p   |
| 350 | GUK1             | GUK1      | UP:Q16774   | 21726  | 53   | 54   | Y53-p, Y54-p     |
| 351 | HAUS4            | HAUS4     | UP:Q9H6D7   | 42400  | 182  | 183  | Y182-p, Y183-p   |
| 352 | HCCS             | HCCS      | UP:P53701   | 30602  | 228  | 229  | Y228-p, Y229-p   |
| 353 | HEG1             | HEG1      | UP:Q9ULI3   | 147461 | 1330 | 1331 | Y1330-p, Y1331-p |
| 354 | HER2             | ERBB2     | UP:P04626   | 137911 | 1221 | 1222 | Y1221-p, Y1222-p |
| 355 | HEXIM1           | HEXIM1    | UP:Q94992   | 40623  | 167  | 168  | Y167-p, Y168-p   |
| 356 | HGD              | HGD       | UP:Q93099   | 49964  | 333  | 334  | Y333-p, Y334-p   |
| 357 | HIPK1            | HIPK1     | UP:Q86Z02   | 130843 | 357  | 358  | Y357-p, Y358-p   |
| 358 | HIPK2            | HIPK2     | UP:Q9H2X6   | 130966 | 366  | 367  | Y366-p, Y367-p   |
| 359 | HIPK4            | HIPK4     | UP:Q8NE63   | 69425  | 392  | 393  | Y392-p, Y393-p   |
| 360 | HMOX2            | HMOX2     | UP:P30519   | 36033  | 314  | 315  | Y314-p, Y315-p   |
| 361 | hnRNP 2H9        | HNRNPH3   | UP:P31942   | 36926  | 331  | 332  | Y331-p, Y332-p   |
| 362 | hnRNP A/B        | HNRNPAB   | UP:Q99729   | 36225  | 300  | 301  | Y300-p, Y301-p   |
| 363 | hnRNP A2/B1      | HNRNPA2B1 | UP:P22626   | 37430  | 40   | 41   | Y40-p, Y41-p     |
| 364 | hnRNP C1/C2      | HNRNPC    | UP:P07910   | 33670  | 132  | 133  | Y132-p, Y133-p   |
| 365 | hnRNP C1/C2 iso2 | HNRNPC    | UP:P07910-2 | 32338  | 119  | 120  | Y119-p, Y120-p   |
| 366 | hnRNP C1/C2 iso4 | HNRNPC    | UP:P07910-4 | 27822  | 119  | 120  | Y119-p, Y120-p   |
| 367 | hnRNP L          | HNRNPL    | UP:P14866   | 64133  | 47   | 48   | Y47-p, Y48-p     |
| 368 | hnRNP R          | HNRNPR    | UP:Q43390   | 70943  | 434  | 435  | Y434-p, Y435-p   |
| 369 | hnRNP R          | HNRNPR    | UP:Q43390   | 70943  | 435  | 436  | Y435-p, Y436-p   |
| 370 | hnRNP U          | HNRNPU    | UP:Q00839   | 90584  | 824  | 825  | Y824-p, Y825-p   |
| 371 | HNRPUL2          | HNRNPUL2  | UP:Q1KMD3   | 85105  | 725  | 726  | Y725-p, Y726-p   |
| 372 | HNRPUL2          | HNRNPUL2  | UP:Q1KMD3   | 85105  | 726  | 727  | Y726-p, Y727-p   |
| 373 | HP               | HP        | UP:P00738   | 45205  | 55   | 56   | Y55-p, Y56-p     |
| 374 | HP               | HP        | UP:P00738   | 45205  | 114  | 115  | Y114-p, Y115-p   |
| 375 | HP1BP3           | HP1BP3    | UP:Q55SJ5   | 61207  | 288  | 289  | Y288-p, Y289-p   |
| 376 | HPD              | HPD       | UP:P32754   | 44934  | 295  | 296  | Y295-p, Y296-p   |
| 377 | HRG              | HRG       | UP:P04196   | 59578  | 67   | 68   | Y67-p, Y68-p     |
| 378 | Hrs              | HGS       | UP:Q14964   | 86192  | 466  | 467  | Y466-p, Y467-p   |
| 379 | HSFY1            | HSFY2     | UP:Q96LI6   | 45107  | 175  | 176  | Y175-p, Y176-p   |

## Supplementary Information

|     |             |           |             |        |      |      |                     |
|-----|-------------|-----------|-------------|--------|------|------|---------------------|
| 380 | HSP75       | TRAP1     | UP:Q12931   | 80110  | 498  | 499  | Y498-p, Y499-p      |
| 381 | HSP90A      | HSP90AA1  | UP:P07900   | 84660  | 492  | 493  | Y492-p, Y493-p      |
| 382 | HSP90A iso2 | HSP90AA1  | UP:P07900-2 | 98161  | 614  | 615  | Y614-p, Y615-p      |
| 383 | HSP90AA5P   | HSP90AA5P | UP:Q58FG0   | 38738  | 177  | 178  | Y177-p, Y178-p      |
| 384 | HSP90B      | HSP90AB1  | UP:P08238   | 83264  | 484  | 485  | Y484-p, Y485-p      |
| 385 | IGF1R       | IGF1R     | UP:P08069   | 154793 | 1165 | 1166 | Y1165-p,<br>Y1166-p |
| 386 | IGF1R       | IGF1R     | UP:P08069   | 154793 | 1280 | 1281 | Y1280-p,<br>Y1281-p |
| 387 | IGF2R       | IGF2R     | UP:P11717   | 274375 | 700  | 701  | Y700-p, Y701-p      |
| 388 | IGF2R       | IGF2R     | UP:P11717   | 274375 | 2024 | 2025 | Y2024-p,<br>Y2025-p |
| 389 | IL32        | IL32      | UP:P24001   | 26676  | 107  | 108  | Y107-p, Y108-p      |
| 390 | ILDR2       | ILDR2     | UP:Q71H61   | 71200  | 477  | 478  | Y477-p, Y478-p      |
| 391 | ILDR2       | ILDR2     | UP:Q71H61   | 71200  | 565  | 566  | Y565-p, Y566-p      |
| 392 | InsR        | INSR      | UP:P06213   | 156333 | 1189 | 1190 | Y1189-p,<br>Y1190-p |
| 393 | InsR iso2   | INSR      | UP:P06213-2 | 155146 | 1177 | 1178 | Y1177-p,<br>Y1178-p |
| 394 | IPMK        | IPMK      | UP:Q8NFU5   | 47222  | 113  | 114  | Y113-p, Y114-p      |
| 395 | IQGAP1      | IQGAP1    | UP:P46940   | 189252 | 694  | 695  | Y694-p, Y695-p      |
| 396 | IQGAP2      | IQGAP2    | UP:Q13576   | 180578 | 579  | 580  | Y579-p, Y580-p      |
| 397 | IQGAP2      | IQGAP2    | UP:Q13576   | 180578 | 611  | 612  | Y611-p, Y612-p      |
| 398 | IQGAP2      | IQGAP2    | UP:Q13576   | 180578 | 612  | 613  | Y612-p, Y613-p      |
| 399 | IRS1        | IRS1      | UP:P35568   | 131591 | 46   | 47   | Y46-p, Y47-p        |
| 400 | IRS2        | IRS2      | UP:Q9Y4H2   | 137334 | 75   | 76   | Y75-p, Y76-p        |
| 401 | ITCH        | ITCH      | UP:Q96J02   | 102803 | 343  | 344  | Y343-p, Y344-p      |
| 402 | ITGB4       | ITGB4     | UP:P16144   | 202167 | 920  | 921  | Y920-p, Y921-p      |
| 403 | ITM1        | STT3A     | UP:P46977   | 80530  | 617  | 618  | Y617-p, Y618-p      |
| 404 | ITPKC       | ITPKC     | UP:Q96DU7   | 75207  | 456  | 457  | Y456-p, Y457-p      |
| 405 | JAG2        | JAG2      | UP:Q9Y219   | 133367 | 202  | 203  | Y202-p, Y203-p      |
| 406 | JAK1        | JAK1      | UP:P23458   | 133277 | 1034 | 1035 | Y1034-p,<br>Y1035-p |
| 407 | JAK2        | JAK2      | UP:O60674   | 130674 | 1007 | 1008 | Y1007-p,<br>Y1008-p |
| 408 | JAK3        | JAK3      | UP:P52333   | 125099 | 980  | 981  | Y980-p, Y981-p      |
| 409 | JPH1        | JPH1      | UP:Q9HDC5   | 71686  | 553  | 554  | Y553-p, Y554-p      |
| 410 | K10         | KRT10     | UP:P13645   | 58827  | 199  | 200  | Y199-p, Y200-p      |
| 411 | K17         | KRT17     | UP:Q04695   | 48106  | 134  | 135  | Y134-p, Y135-p      |
| 412 | K19         | KRT19     | UP:P08727   | 44106  | 130  | 131  | Y130-p, Y131-p      |
| 413 | KA35        | KRT39     | UP:Q6A163   | 55651  | 146  | 147  | Y146-p, Y147-p      |
| 414 | KBTBD4      | KBTBD4    | UP:Q9NVX7   | 58144  | 350  | 351  | Y350-p, Y351-p      |
| 415 | KCC1        | SLC12A4   | UP:Q9UP95   | 120650 | 61   | 62   | Y61-p, Y62-p        |
| 416 | KCNJ2       | KCNJ2     | UP:P63252   | 48288  | 336  | 337  | Y336-p, Y337-p      |
| 417 | KCTD7       | KCTD7     | UP:Q96MP8   | 33132  | 162  | 163  | Y162-p, Y163-p      |
| 418 | KDF1        | KDF1      | UP:Q8NAX2   | 43642  | 216  | 217  | Y216-p, Y217-p      |
| 419 | KHS2        | MAP4K3    | UP:Q8IVH8   | 101316 | 366  | 367  | Y366-p, Y367-p      |
| 420 | KHSRP       | KHSRP     | UP:Q92945   | 73115  | 625  | 626  | Y625-p, Y626-p      |
| 421 | KHSRP       | KHSRP     | UP:Q92945   | 73115  | 651  | 652  | Y651-p, Y652-p      |
| 422 | KIAA0922    | KIAA0922  | UP:A2VDJ0   | 179339 | 1288 | 1289 | Y1288-p,<br>Y1289-p |
| 423 | KIAA1033    | KIAA1033  | UP:Q2M389   | 136403 | 405  | 406  | Y405-p, Y406-p      |
| 424 | KIAA1430    | KIAA1430  | UP:Q9P2B7   | 59475  | 131  | 132  | Y131-p, Y132-p      |
| 425 | Kidins220   | KIDINS220 | UP:Q9ULH0   | 196542 | 1150 | 1151 | Y1150-p,<br>Y1151-p |
| 426 | KIF1A       | KIF1A     | UP:Q12756   | 191064 | 682  | 683  | Y682-p, Y683-p      |
| 427 | KIFAP3      | KIFAP3    | UP:Q92845   | 91205  | 786  | 787  | Y786-p, Y787-p      |
| 428 | KIFAP3      | KIFAP3    | UP:Q92845   | 91205  | 787  | 788  | Y787-p, Y788-p      |
| 429 | Kir4.1      | KCNJ10    | UP:P78508   | 42508  | 8    | 9    | Y8-p, Y9-p          |
| 430 | KIRREL      | KIRREL    | UP:Q96J84   | 83536  | 605  | 606  | Y605-p, Y606-p      |
| 431 | KLC2        | KLC2      | UP:Q9H0B6   | 68935  | 345  | 346  | Y345-p, Y346-p      |
| 432 | KLC2        | KLC2      | UP:Q9H0B6   | 68935  | 346  | 347  | Y346-p, Y347-p      |
| 433 | KLHDC7A     | KLHDC7A   | UP:Q5VTJ3   | 84479  | 292  | 293  | Y292-p, Y293-p      |
| 434 | KRTAP20-3   | KRTAP20-3 | UP:Q3LI60   | 4909   | 7    | 8    | Y7-p, Y8-p          |
| 435 | KRTAP6-1    | KRTAP6-1  | UP:Q3LI64   | 7279   | 69   | 70   | Y69-p, Y70-p        |
| 436 | KRTCAP2     | KRTCAP2   | UP:Q8N6L1   | 14679  | 106  | 107  | Y106-p, Y107-p      |
| 437 | Ku70        | XRCC6     | UP:P12956   | 69843  | 7    | 8    | Y7-p, Y8-p          |
| 438 | Kv1.3       | KCNA3     | UP:P22001   | 63842  | 161  | 162  | Y161-p, Y162-p      |
| 439 | Kv1.3       | KCNA3     | UP:P22001   | 63842  | 162  | 163  | Y162-p, Y163-p      |
| 440 | L-plastin   | LCP1      | UP:P13796   | 70288  | 299  | 300  | Y299-p, Y300-p      |
| 441 | LAB         | LAT2      | UP:Q9GZY6   | 26550  | 118  | 119  | Y118-p, Y119-p      |
| 442 | LACE1       | LACE1     | UP:Q8WV93   | 54845  | 295  | 296  | Y295-p, Y296-p      |

## Supplementary Information

|     |               |          |             |        |      |      |                  |
|-----|---------------|----------|-------------|--------|------|------|------------------|
| 443 | LAMA2         | LAMA2    | UP:P24043   | 343905 | 274  | 275  | Y274-p, Y275-p   |
| 444 | LAMA5         | LAMA5    | UP:O15230   | 399737 | 287  | 288  | Y287-p, Y288-p   |
| 445 | LAMA5         | LAMA5    | UP:O15230   | 399737 | 288  | 289  | Y288-p, Y289-p   |
| 446 | LAMB4         | LAMB4    | UP:A4D0S4   | 193540 | 252  | 253  | Y252-p, Y253-p   |
| 447 | LAMB4         | LAMB4    | UP:A4D0S4   | 193540 | 253  | 254  | Y253-p, Y254-p   |
| 448 | LAMC1         | LAMC1    | UP:P11047   | 177603 | 273  | 274  | Y273-p, Y274-p   |
| 449 | LAMC1         | LAMC1    | UP:P11047   | 177603 | 274  | 275  | Y274-p, Y275-p   |
| 450 | latrophilin 1 | LPHN1    | UP:O94910   | 162717 | 966  | 967  | Y966-p, Y967-p   |
| 451 | latrophilin 1 | LPHN1    | UP:O94910   | 162717 | 1141 | 1142 | Y1141-p, Y1142-p |
| 452 | latrophilin 1 | LPHN1    | UP:O94910   | 162717 | 1440 | 1441 | Y1440-p, Y1441-p |
| 453 | latrophilin 2 | LPHN2    | UP:O95490   | 163349 | 1406 | 1407 | Y1406-p, Y1407-p |
| 454 | latrophilin 3 | LPHN3    | UP:Q9HAR2   | 161812 | 1411 | 1412 | Y1411-p, Y1412-p |
| 455 | LBR           | LBR      | UP:Q14739   | 70703  | 22   | 23   | Y22-p, Y23-p     |
| 456 | Lck           | LCK      | UP:P06239   | 58001  | 263  | 264  | Y263-p, Y264-p   |
| 457 | LEF-1         | LEF1     | UP:Q9UJU2   | 44201  | 348  | 349  | Y348-p, Y349-p   |
| 458 | LEPR          | LEPR     | UP:P48357   | 132494 | 795  | 796  | Y795-p, Y796-p   |
| 459 | LHPP          | LHPP     | UP:Q9H008   | 29165  | 158  | 159  | Y158-p, Y159-p   |
| 460 | LIG3          | LIG3     | UP:P49916   | 112907 | 767  | 768  | Y767-p, Y768-p   |
| 461 | LILRA6        | LILRA6   | UP:Q6PI73   | 52399  | 198  | 199  | Y198-p, Y199-p   |
| 462 | LIMD1         | LIMD1    | UP:Q9UGP4   | 72190  | 179  | 180  | Y179-p, Y180-p   |
| 463 | LISCH         | LSR      | UP:Q86X29   | 71439  | 406  | 407  | Y406-p, Y407-p   |
| 464 | LISCH         | LSR      | UP:Q86X29   | 71439  | 615  | 616  | Y615-p, Y616-p   |
| 465 | LITAF         | LITAF    | UP:Q99732   | 17107  | 32   | 33   | Y32-p, Y33-p     |
| 466 | LITAF         | LITAF    | UP:Q99732   | 17107  | 61   | 62   | Y61-p, Y62-p     |
| 467 | LMAN2L        | LMAN2L   | UP:Q9H0V9   | 39711  | 249  | 250  | Y249-p, Y250-p   |
| 468 | LMBRD2        | LMBRD2   | UP:Q68DH5   | 81172  | 154  | 155  | Y154-p, Y155-p   |
| 469 | LMO7          | LMO7     | UP:Q8WWI1   | 192696 | 185  | 186  | Y185-p, Y186-p   |
| 470 | Lmr3          | LMTK3    | UP:Q96Q04   | 153661 | 296  | 297  | Y296-p, Y297-p   |
| 471 | LPIN2         | LPIN2    | UP:Q92539   | 99399  | 518  | 519  | Y518-p, Y519-p   |
| 472 | LPP           | LPP      | UP:Q93052   | 65746  | 296  | 297  | Y296-p, Y297-p   |
| 473 | LPP           | LPP      | UP:Q93052   | 65746  | 300  | 301  | Y300-p, Y301-p   |
| 474 | LRIF1         | LRIF1    | UP:Q5T3J3   | 84568  | 697  | 698  | Y697-p, Y698-p   |
| 475 | LRP2BP        | LRP2BP   | UP:Q9P2M1   | 39780  | 182  | 183  | Y182-p, Y183-p   |
| 476 | LRRC3B        | LRRC3B   | UP:Q96PB8   | 29275  | 223  | 224  | Y223-p, Y224-p   |
| 477 | LSD1          | KDM1A    | UP:O60341   | 92903  | 135  | 136  | Y135-p, Y136-p   |
| 478 | LSM14B        | LSM14B   | UP:Q9BX40   | 42071  | 311  | 312  | Y311-p, Y312-p   |
| 479 | LTF           | LTF      | UP:P02788   | 78182  | 111  | 112  | Y111-p, Y112-p   |
| 480 | LTK           | LTK      | UP:P29376   | 91681  | 676  | 677  | Y676-p, Y677-p   |
| 481 | LTV1          | LTV1     | UP:Q96GA3   | 54855  | 301  | 302  | Y301-p, Y302-p   |
| 482 | LURAP1L       | LURAP1L  | UP:Q8IV03   | 24583  | 227  | 228  | Y227-p, Y228-p   |
| 483 | LYAR          | LYAR     | UP:Q9NX58   | 43615  | 340  | 341  | Y340-p, Y341-p   |
| 484 | Lyn           | LYN      | UP:P07948   | 58574  | 193  | 194  | Y193-p, Y194-p   |
| 485 | Lyn           | LYN      | UP:P07948   | 58574  | 265  | 266  | Y265-p, Y266-p   |
| 486 | Lyn iso2      | LYN      | UP:P07948-2 | 56033  | 172  | 173  | Y172-p, Y173-p   |
| 487 | MAB21L1       | MAB21L1  | UP:Q13394   | 40956  | 15   | 16   | Y15-p, Y16-p     |
| 488 | MAB21L2       | MAB21L2  | UP:Q9Y586   | 40923  | 15   | 16   | Y15-p, Y16-p     |
| 489 | MAGE-D2       | MAGED2   | UP:Q9UNF1   | 64954  | 448  | 449  | Y448-p, Y449-p   |
| 490 | MAGI1         | MAGI1    | UP:Q96QZ7   | 164581 | 376  | 377  | Y376-p, Y377-p   |
| 491 | MAN2A1        | MAN2A1   | UP:Q16706   | 131141 | 532  | 533  | Y532-p, Y533-p   |
| 492 | MAP1B         | MAP1B    | UP:P46821   | 270634 | 1336 | 1337 | Y1336-p, Y1337-p |
| 493 | MAP1B         | MAP1B    | UP:P46821   | 270634 | 1904 | 1905 | Y1904-p, Y1905-p |
| 494 | MAP1B         | MAP1B    | UP:P46821   | 270634 | 1905 | 1906 | Y1905-p, Y1906-p |
| 495 | MAP2          | MAP2     | UP:P11137   | 199526 | 592  | 593  | Y592-p, Y593-p   |
| 496 | MAPKAPK3      | MAPKAPK3 | UP:Q16644   | 42987  | 207  | 208  | Y207-p, Y208-p   |
| 497 | matrin 3      | MATR3    | UP:P43243   | 94623  | 213  | 214  | Y213-p, Y214-p   |
| 498 | MBD3          | MBD3     | UP:O95983   | 32844  | 35   | 36   | Y35-p, Y36-p     |
| 499 | MCM8          | MCM8     | UP:Q9UJA3   | 93697  | 214  | 215  | Y214-p, Y215-p   |
| 500 | MED1          | MED1     | UP:Q15648   | 168478 | 224  | 225  | Y224-p, Y225-p   |
| 501 | MEKK3         | MAP3K3   | UP:Q99759   | 70898  | 427  | 428  | Y427-p, Y428-p   |
| 502 | Mer           | MERTK    | UP:Q12866   | 110249 | 753  | 754  | Y753-p, Y754-p   |
| 503 | Met           | MET      | UP:P08581   | 155541 | 1234 | 1235 | Y1234-p, Y1235-p |
| 504 | METTL25       | METTL25  | UP:Q8N6Q8   | 68213  | 172  | 173  | Y172-p, Y173-p   |
| 505 | MFI2          | MFI2     | UP:P08582   | 80215  | 207  | 208  | Y207-p, Y208-p   |
| 506 | MGAM          | MGAM     | UP:O43451   | 209852 | 1172 | 1173 | Y1172-p, Y1173-p |

## Supplementary Information

|     |             |          |             |        |      |      |                     |
|-----|-------------|----------|-------------|--------|------|------|---------------------|
|     |             |          |             |        |      |      | Y1173-p             |
| 507 | MGAM        | MGAM     | UP:O43451   | 209852 | 1685 | 1686 | Y1685-p,<br>Y1686-p |
| 508 | MGAT4A      | MGAT4A   | UP:Q9UM21   | 61544  | 255  | 256  | Y255-p, Y256-p      |
| 509 | MGAT4B      | MGAT4B   | UP:Q9UQ53   | 63198  | 262  | 263  | Y262-p, Y263-p      |
| 510 | MGAT4C      | MGAT4C   | UP:Q9UBM8   | 56061  | 178  | 179  | Y178-p, Y179-p      |
| 511 | midasin     | MDN1     | UP:Q9NU22   | 632820 | 3919 | 3920 | Y3919-p,<br>Y3920-p |
| 512 | MIF         | MIF      | UP:P14174   | 12476  | 99   | 100  | Y99-p, Y100-p       |
| 513 | MIG-6       | ERRF1    | UP:Q9UJM3   | 50560  | 394  | 395  | Y394-p, Y395-p      |
| 514 | MINA        | MINA     | UP:Q8IUF8   | 52800  | 76   | 77   | Y76-p, Y77-p        |
| 515 | MIPEP       | MIPEP    | UP:Q99797   | 80641  | 632  | 633  | Y632-p, Y633-p      |
| 516 | MLEC        | MLEC     | UP:Q14165   | 32234  | 199  | 200  | Y199-p, Y200-p      |
| 517 | MMP20       | MMP20    | UP:O60882   | 54387  | 48   | 49   | Y48-p, Y49-p        |
| 518 | MMP3        | MMP3     | UP:P08254   | 53977  | 41   | 42   | Y41-p, Y42-p        |
| 519 | MND1        | MND1     | UP:Q9BWT6   | 23753  | 70   | 71   | Y70-p, Y71-p        |
| 520 | MOV10       | MOV10    | UP:Q9HCE1   | 113671 | 746  | 747  | Y746-p, Y747-p      |
| 521 | MRPL4       | MRPL4    | UP:Q9BYD3   | 34919  | 161  | 162  | Y161-p, Y162-p      |
| 522 | MTSS1       | MTSS1    | UP:O43312   | 82251  | 393  | 394  | Y393-p, Y394-p      |
| 523 | MUC2        | MUC2     | UP:Q02817   | 540300 | 610  | 611  | Y610-p, Y611-p      |
| 524 | MuSK        | MUSK     | UP:Q15146   | 97056  | 755  | 756  | Y755-p, Y756-p      |
| 525 | MYBPC1      | MYBPC1   | UP:Q00872   | 128294 | 823  | 824  | Y823-p, Y824-p      |
| 526 | MYBPC3      | MYBPC3   | UP:Q14896   | 140762 | 1135 | 1136 | Y1135-p,<br>Y1136-p |
| 527 | MYH6        | MYH6     | UP:P13533   | 223735 | 422  | 423  | Y422-p, Y423-p      |
| 528 | MYO18A      | MYO18A   | UP:Q92614   | 233115 | 904  | 905  | Y904-p, Y905-p      |
| 529 | MYO1D       | MYO1D    | UP:O94832   | 116202 | 585  | 586  | Y585-p, Y586-p      |
| 530 | myomesin 3  | MYOM3    | UP:Q5VTT5   | 162189 | 1244 | 1245 | Y1244-p,<br>Y1245-p |
| 531 | MYSM1       | MYSM1    | UP:Q5VVJ2   | 95032  | 74   | 75   | Y74-p, Y75-p        |
| 532 | N-CoR1      | NCOR1    | UP:O75376   | 270210 | 341  | 342  | Y341-p, Y342-p      |
| 533 | N-CoR1      | NCOR1    | UP:O75376   | 270210 | 477  | 478  | Y477-p, Y478-p      |
| 534 | NAA10       | NAA10    | UP:P41227   | 26459  | 137  | 138  | Y137-p, Y138-p      |
| 535 | NAA11       | NAA11    | UP:Q9BSU3   | 25979  | 137  | 138  | Y137-p, Y138-p      |
| 536 | NAA20       | NAA20    | UP:P61599   | 20368  | 137  | 138  | Y137-p, Y138-p      |
| 537 | NCL         | NCL      | UP:P19338   | 76614  | 462  | 463  | Y462-p, Y463-p      |
| 538 | NCoA7       | NCOA7    | UP:Q8NI08   | 106162 | 87   | 88   | Y87-p, Y88-p        |
| 539 | NCoA7       | NCOA7    | UP:Q8NI08   | 106162 | 525  | 526  | Y525-p, Y526-p      |
| 540 | NDST1       | NDST1    | UP:P52848   | 100868 | 851  | 852  | Y851-p, Y852-p      |
| 541 | NDUFA1      | NDUFA1   | UP:O15239   | 8072   | 60   | 61   | Y60-p, Y61-p        |
| 542 | NDUFB10     | NDUFB10  | UP:O96000   | 20777  | 55   | 56   | Y55-p, Y56-p        |
| 543 | NDUFB10     | NDUFB10  | UP:O96000   | 20777  | 56   | 57   | Y56-p, Y57-p        |
| 544 | NEK10       | NEK10    | UP:Q6ZWH5   | 133259 | 590  | 591  | Y590-p, Y591-p      |
| 545 | NEK6        | NEK6     | UP:Q9HC98   | 35714  | 212  | 213  | Y212-p, Y213-p      |
| 546 | NEK7        | NEK7     | UP:Q8TDX7   | 34551  | 201  | 202  | Y201-p, Y202-p      |
| 547 | NFkB-p100   | NFKB2    | UP:Q00653   | 96749  | 325  | 326  | Y325-p, Y326-p      |
| 548 | NHS         | NHS      | UP:Q6T4R5   | 179135 | 202  | 203  | Y202-p, Y203-p      |
| 549 | NHS         | NHS      | UP:Q6T4R5   | 179135 | 784  | 785  | Y784-p, Y785-p      |
| 550 | NICE-4      | UBAP2L   | UP:Q14157   | 114535 | 834  | 835  | Y834-p, Y835-p      |
| 551 | NICE-4 iso2 | UBAP2L   | UP:Q14157-1 | 103930 | 834  | 835  | Y834-p, Y835-p      |
| 552 | NIPSNAP1    | NIPSNAP1 | UP:Q9BPW8   | 33310  | 261  | 262  | Y261-p, Y262-p      |
| 553 | NKTR        | NKTR     | UP:P30414   | 165677 | 414  | 415  | Y414-p, Y415-p      |
| 554 | NNMT        | NNMT     | UP:P40261   | 29574  | 24   | 25   | Y24-p, Y25-p        |
| 555 | NNMT        | NNMT     | UP:P40261   | 29574  | 203  | 204  | Y203-p, Y204-p      |
| 556 | NOL10       | NOL10    | UP:Q9BSC4   | 80302  | 339  | 340  | Y339-p, Y340-p      |
| 557 | NOT2        | CNOT2    | UP:Q9NZN8   | 59738  | 43   | 44   | Y43-p, Y44-p        |
| 558 | NPHS2       | NPHS2    | UP:Q9NP85   | 42201  | 194  | 195  | Y194-p, Y195-p      |
| 559 | NPM-ALK     | NPM/ALK  | GP:AAA58698 | 75314  | 342  | 343  | Y342-p, Y343-p      |
| 560 | NPY         | NPY      | UP:P01303   | 10851  | 48   | 49   | Y48-p, Y49-p        |
| 561 | NRK         | NRK      | UP:Q722Y5   | 178479 | 984  | 985  | Y984-p, Y985-p      |
| 562 | NRP1        | NRP1     | UP:O14786   | 103134 | 353  | 354  | Y353-p, Y354-p      |
| 563 | NSAP1       | SYNCRIP  | UP:O60506   | 69603  | 431  | 432  | Y431-p, Y432-p      |
| 564 | NSUN3       | NSUN3    | UP:Q9H649   | 38244  | 113  | 114  | Y113-p, Y114-p      |
| 565 | NT5C3B      | NT5C3B   | UP:Q969T7   | 34389  | 84   | 85   | Y84-p, Y85-p        |
| 566 | NTS         | NTS      | UP:P30990   | 19795  | 168  | 169  | Y168-p, Y169-p      |
| 567 | NTS         | NTS      | UP:P30990   | 19795  | 169  | 170  | Y169-p, Y170-p      |
| 568 | NUCB2       | NUCB2    | UP:P80303   | 50196  | 53   | 54   | Y53-p, Y54-p        |
| 569 | NUP155      | NUP155   | UP:O75694   | 155199 | 1084 | 1085 | Y1084-p,<br>Y1085-p |
| 570 | OCIAD1      | OCIAD1   | UP:Q9NX40   | 27626  | 128  | 129  | Y128-p, Y129-p      |
| 571 | ODZ1        | TENM1    | UP:Q9UKZ4   | 305011 | 1239 | 1240 | Y1239-p,            |

## Supplementary Information

|     |                    |         |             |        |      |      |                     |
|-----|--------------------|---------|-------------|--------|------|------|---------------------|
|     |                    |         |             |        |      |      | Y1240-p             |
| 572 | ODZ3               | TENM3   | UP:Q9P273   | 300951 | 1217 | 1218 | Y1217-p,<br>Y1218-p |
| 573 | OSAP               | MGARP   | UP:Q8TDB4   | 25390  | 61   | 62   | Y61-p, Y62-p        |
| 574 | OSBPL3             | OSBPL3  | UP:Q9H4L5   | 101224 | 597  | 598  | Y597-p, Y598-p      |
| 575 | OSER1              | OSER1   | UP:Q9NX31   | 31779  | 275  | 276  | Y275-p, Y276-p      |
| 576 | p27Kip1            | CDKN1B  | UP:P46527   | 22073  | 88   | 89   | Y88-p, Y89-p        |
| 577 | P2X4               | P2RX4   | UP:Q99571   | 43369  | 299  | 300  | Y299-p, Y300-p      |
| 578 | p300               | EP300   | UP:Q09472   | 264161 | 629  | 630  | Y629-p, Y630-p      |
| 579 | PAR3-alpha         | PARD3   | UP:Q8TEW0   | 151423 | 377  | 378  | Y377-p, Y378-p      |
| 580 | PARP14             | PARP14  | UP:Q460N5   | 202800 | 300  | 301  | Y300-p, Y301-p      |
| 581 | PCAF               | KAT2B   | UP:Q92831   | 93013  | 809  | 810  | Y809-p, Y810-p      |
| 582 | PCDH1 iso2         | PCDH1   | UP:Q08174-2 | 133722 | 1058 | 1059 | Y1058-p,<br>Y1059-p |
| 583 | PCDH8              | PCDH8   | UP:O95206   | 113019 | 1003 | 1004 | Y1003-p,<br>Y1004-p |
| 584 | PCDHGA7            | PCDHGA7 | UP:Q9Y5G6   | 101722 | 401  | 402  | Y401-p, Y402-p      |
| 585 | PCGF2              | PCGF2   | UP:P35227   | 37788  | 205  | 206  | Y205-p, Y206-p      |
| 586 | PCMTD1             | PCMTD1  | UP:Q96MG8   | 40675  | 41   | 42   | Y41-p, Y42-p        |
| 587 | PCSK5              | PCSK5   | UP:Q92824   | 206942 | 71   | 72   | Y71-p, Y72-p        |
| 588 | PDE8A              | PDE8A   | UP:O60658   | 93304  | 290  | 291  | Y290-p, Y291-p      |
| 589 | PDHA1              | PDHA1   | UP:P08559   | 43296  | 242  | 243  | Y242-p, Y243-p      |
| 590 | PDHA2              | PDHA2   | UP:P29803   | 42933  | 62   | 63   | Y62-p, Y63-p        |
| 591 | PDHK1              | PDK1    | UP:Q15118   | 49244  | 243  | 244  | Y243-p, Y244-p      |
| 592 | PDK1               | PDPK1   | UP:O15530   | 63152  | 485  | 486  | Y485-p, Y486-p      |
| 593 | PDPR               | PDPR    | UP:Q8NCN5   | 99364  | 109  | 110  | Y109-p, Y110-p      |
| 594 | PEG10              | PEG10   | UP:Q86TG7   | 80173  | 494  | 495  | Y494-p, Y495-p      |
| 595 | PERK               | EIF2AK3 | UP:Q9NZJ5   | 125216 | 480  | 481  | Y480-p, Y481-p      |
| 596 | PERK               | EIF2AK3 | UP:Q9NZJ5   | 125216 | 484  | 485  | Y484-p, Y485-p      |
| 597 | PEX11A             | PEX11A  | UP:O75192   | 28353  | 127  | 128  | Y127-p, Y128-p      |
| 598 | PEX11A             | PEX11A  | UP:O75192   | 28353  | 128  | 129  | Y128-p, Y129-p      |
| 599 | PFDN5              | PFDN5   | UP:Q99471   | 17328  | 90   | 91   | Y90-p, Y91-p        |
| 600 | PFKFB1             | PFKFB1  | UP:P16118   | 54681  | 242  | 243  | Y242-p, Y243-p      |
| 601 | PFKL               | PFKL    | UP:P17858   | 85018  | 633  | 634  | Y633-p, Y634-p      |
| 602 | PGAM2              | PGAM2   | UP:P15259   | 28766  | 132  | 133  | Y132-p, Y133-p      |
| 603 | PGC                | PGC     | UP:P20142   | 42426  | 371  | 372  | Y371-p, Y372-p      |
| 604 | PGM2               | PGM2    | UP:Q96G03   | 68283  | 568  | 569  | Y568-p, Y569-p      |
| 605 | PHF10              | PHF10   | UP:Q8WUB8   | 56051  | 265  | 266  | Y265-p, Y266-p      |
| 606 | PHF19              | PHF19   | UP:Q5T6S3   | 65591  | 55   | 56   | Y55-p, Y56-p        |
| 607 | PHF8               | PHF8    | UP:Q9UUP1   | 117864 | 214  | 215  | Y214-p, Y215-p      |
| 608 | PHF8               | PHF8    | UP:Q9UUP1   | 117864 | 215  | 216  | Y215-p, Y216-p      |
| 609 | PhLP               | PDCL    | UP:Q13371   | 34282  | 16   | 17   | Y16-p, Y17-p        |
| 610 | PHLPP              | PHLPP1  | UP:O60346   | 184672 | 1712 | 1713 | Y1712-p,<br>Y1713-p |
| 611 | PIGA iso4          | PIGA    | UP:A8K382   | 13215  | 90   | 91   | Y90-p, Y91-p        |
| 612 | PIK3C2A            | PIK3C2A | UP:O00443   | 190680 | 900  | 901  | Y900-p, Y901-p      |
| 613 | PIK3C3             | PIK3C3  | UP:Q8NEB9   | 101549 | 321  | 322  | Y321-p, Y322-p      |
| 614 | PIK3CB             | PIK3CB  | UP:P42338   | 122762 | 503  | 504  | Y503-p, Y504-p      |
| 615 | PIK3CB             | PIK3CB  | UP:P42338   | 122762 | 504  | 505  | Y504-p, Y505-p      |
| 616 | PIK3CD             | PIK3CD  | UP:O00329   | 119479 | 484  | 485  | Y484-p, Y485-p      |
| 617 | PIK3R4             | PIK3R4  | UP:Q99570   | 153103 | 1290 | 1291 | Y1290-p,<br>Y1291-p |
| 618 | PIK4CA             | PI4KA   | UP:P42356   | 231319 | 973  | 974  | Y973-p, Y974-p      |
| 619 | PIKFYVE            | PIKFYVE | UP:Q9Y2I7   | 237136 | 1772 | 1773 | Y1772-p,<br>Y1773-p |
| 620 | PIWIL4             | PIWIL4  | UP:Q7Z3Z4   | 96589  | 339  | 340  | Y339-p, Y340-p      |
| 621 | PKACB              | PRKACB  | UP:P22694   | 40623  | 69   | 70   | Y69-p, Y70-p        |
| 622 | PKCA               | PRKCA   | UP:P17252   | 76750  | 285  | 286  | Y285-p, Y286-p      |
| 623 | PKG2               | PRKG2   | UP:Q13237   | 87432  | 306  | 307  | Y306-p, Y307-p      |
| 624 | PLA2G2D            | PLA2G2D | UP:Q9UNK4   | 16546  | 85   | 86   | Y85-p, Y86-p        |
| 625 | plakophilin 4      | PKP4    | UP:Q99569   | 131868 | 420  | 421  | Y420-p, Y421-p      |
| 626 | plakophilin 4      | PKP4    | UP:Q99569   | 131868 | 1115 | 1116 | Y1115-p,<br>Y1116-p |
| 627 | plakophilin 4 iso2 | PKP4    | UP:Q99569-2 | 127144 | 420  | 421  | Y420-p, Y421-p      |
| 628 | plakophilin 4 iso2 | PKP4    | UP:Q99569-2 | 127144 | 1072 | 1073 | Y1072-p,<br>Y1073-p |
| 629 | PLCB1              | PLCB1   | UP:Q9NQ66   | 138567 | 1024 | 1025 | Y1024-p,<br>Y1025-p |
| 630 | PLCE1              | PLCE1   | UP:Q9P212   | 258715 | 1400 | 1401 | Y1400-p,<br>Y1401-p |
| 631 | PLCE1              | PLCE1   | UP:Q9P212   | 258715 | 1401 | 1402 | Y1401-p,            |

## Supplementary Information

|     |                |          |             |        |      |      |                  |
|-----|----------------|----------|-------------|--------|------|------|------------------|
|     |                |          |             |        |      |      | Y1402-p          |
| 632 | pleckstrin     | PLEK     | UP:P08567   | 40125  | 277  | 278  | Y277-p, Y278-p   |
| 633 | Plectin-1      | PLEC     | UP:Q15149   | 531791 | 4517 | 4518 | Y4517-p, Y4518-p |
| 634 | Plectin-1      | PLEC     | UP:Q15149   | 531791 | 4611 | 4612 | Y4611-p, Y4612-p |
| 635 | Plectin-1 iso2 | PLEC     | UP:Q15149-2 | 518473 | 4501 | 4502 | Y4501-p, Y4502-p |
| 636 | Plectin-1 iso4 | PLEC     | UP:Q15149-4 | 516198 | 4474 | 4475 | Y4474-p, Y4475-p |
| 637 | Plectin-1 iso6 | PLEC     | UP:Q15149-6 | 516479 | 4478 | 4479 | Y4478-p, Y4479-p |
| 638 | PLEK2          | PLEK2    | UP:Q9NYT0   | 39971  | 332  | 333  | Y332-p, Y333-p   |
| 639 | PLEKHA6        | PLEKHA6  | UP:Q9Y2H5   | 117128 | 364  | 365  | Y364-p, Y365-p   |
| 640 | PLEKHA6        | PLEKHA6  | UP:Q9Y2H5   | 117128 | 433  | 434  | Y433-p, Y434-p   |
| 641 | PLEKHB1        | PLEKHB1  | UP:Q9UF11   | 27186  | 175  | 176  | Y175-p, Y176-p   |
| 642 | PLEKHH2        | PLEKHH2  | UP:Q8IVE3   | 168229 | 839  | 840  | Y839-p, Y840-p   |
| 643 | PLK2           | PLK2     | UP:Q9NYY3   | 78237  | 184  | 185  | Y184-p, Y185-p   |
| 644 | PLPB1          | MYT1     | UP:Q01538   | 122329 | 427  | 428  | Y427-p, Y428-p   |
| 645 | PLXNA4         | PLXNA4   | UP:Q9HCM2   | 212455 | 1138 | 1139 | Y1138-p, Y1139-p |
| 646 | PM20D2         | PM20D2   | UP:Q8IY51   | 47776  | 314  | 315  | Y314-p, Y315-p   |
| 647 | PMPCB          | PMPCB    | UP:O75439   | 54366  | 141  | 142  | Y141-p, Y142-p   |
| 648 | POLE           | POLE     | UP:Q07864   | 261518 | 84   | 85   | Y84-p, Y85-p     |
| 649 | POMT2          | POMT2    | UP:Q9UKY4   | 84214  | 95   | 96   | Y95-p, Y96-p     |
| 650 | POR            | POR      | UP:P16435   | 76690  | 373  | 374  | Y373-p, Y374-p   |
| 651 | PPhLN1         | PPhLN1   | UP:Q8NEY8   | 52737  | 52   | 53   | Y52-p, Y53-p     |
| 652 | PPIP5K2        | PPIP5K2  | UP:O43314   | 140407 | 334  | 335  | Y334-p, Y335-p   |
| 653 | PPP1R15B       | PPP1R15B | UP:Q5SWA1   | 79152  | 650  | 651  | Y650-p, Y651-p   |
| 654 | PPP1R16B       | PPP1R16B | UP:Q96T49   | 63551  | 536  | 537  | Y536-p, Y537-p   |
| 655 | PPP1R3B        | PPP1R3B  | UP:Q86X16   | 32695  | 213  | 214  | Y213-p, Y214-p   |
| 656 | PPP2R5C        | PPP2R5C  | UP:Q13362   | 61061  | 348  | 349  | Y348-p, Y349-p   |
| 657 | PRDM14         | PRDM14   | UP:Q9GZV8   | 64062  | 29   | 30   | Y29-p, Y30-p     |
| 658 | PRDM16         | PRDM16   | UP:Q9HAZ2   | 140251 | 193  | 194  | Y193-p, Y194-p   |
| 659 | PRMT1          | PRMT1    | UP:Q99873   | 41516  | 42   | 43   | Y42-p, Y43-p     |
| 660 | PROB1          | PROB1    | UP:E7EW31   | 106917 | 891  | 892  | Y891-p, Y892-p   |
| 661 | PRPF4          | PRPF4    | UP:O43172   | 58449  | 31   | 32   | Y31-p, Y32-p     |
| 662 | PSMA2          | PSMA2    | UP:P25787   | 25899  | 97   | 98   | Y97-p, Y98-p     |
| 663 | PSMA6          | PSMA6    | UP:P60900   | 27399  | 159  | 160  | Y159-p, Y160-p   |
| 664 | PSMB2          | PSMB2    | UP:P49721   | 22836  | 146  | 147  | Y146-p, Y147-p   |
| 665 | PSMB3          | PSMB3    | UP:P49720   | 22949  | 103  | 104  | Y103-p, Y104-p   |
| 666 | PSMB4          | PSMB4    | UP:P28070   | 29204  | 222  | 223  | Y222-p, Y223-p   |
| 667 | PSMB8          | PSMB8    | UP:P28062   | 30354  | 184  | 185  | Y184-p, Y185-p   |
| 668 | PSMD12         | PSMD12   | UP:O00232   | 52904  | 369  | 370  | Y369-p, Y370-p   |
| 669 | PSMD8          | PSMD8    | UP:P48556   | 39612  | 315  | 316  | Y315-p, Y316-p   |
| 670 | PSRC2          | ZFC3H1   | UP:O60293   | 226356 | 1161 | 1162 | Y1161-p, Y1162-p |
| 671 | PTEN           | PTEN     | UP:P60484   | 47166  | 176  | 177  | Y176-p, Y177-p   |
| 672 | PTEN           | PTEN     | UP:P60484   | 47166  | 177  | 178  | Y177-p, Y178-p   |
| 673 | PTP1B          | PTPN1    | UP:P18031   | 49967  | 152  | 153  | Y152-p, Y153-p   |
| 674 | PTPRD          | PTPRD    | UP:P23468   | 214760 | 1140 | 1141 | Y1140-p, Y1141-p |
| 675 | PTPRF          | PTPRF    | UP:P10586   | 212879 | 450  | 451  | Y450-p, Y451-p   |
| 676 | PTPRT          | PTPRT    | UP:O14522   | 162134 | 107  | 108  | Y107-p, Y108-p   |
| 677 | PUS7L          | PUS7L    | UP:Q9H0K6   | 80700  | 428  | 429  | Y428-p, Y429-p   |
| 678 | PVRL3          | PVRL3    | UP:Q9NQS3   | 61002  | 510  | 511  | Y510-p, Y511-p   |
| 679 | PYGB           | PYGB     | UP:P11216   | 96696  | 75   | 76   | Y75-p, Y76-p     |
| 680 | PYGB           | PYGB     | UP:P11216   | 96696  | 84   | 85   | Y84-p, Y85-p     |
| 681 | PYGB           | PYGB     | UP:P11216   | 96696  | 732  | 733  | Y732-p, Y733-p   |
| 682 | PYGL           | PYGL     | UP:P06737   | 97149  | 75   | 76   | Y75-p, Y76-p     |
| 683 | PYGM           | PYGM     | UP:P11217   | 97092  | 84   | 85   | Y84-p, Y85-p     |
| 684 | PYGM           | PYGM     | UP:P11217   | 97092  | 732  | 733  | Y732-p, Y733-p   |
| 685 | Pyk2           | PTK2B    | UP:Q14289   | 115875 | 579  | 580  | Y579-p, Y580-p   |
| 686 | PZP            | PZP      | UP:P20742   | 163863 | 700  | 701  | Y700-p, Y701-p   |
| 687 | RA70           | SKAP2    | UP:O75563   | 41217  | 151  | 152  | Y151-p, Y152-p   |
| 688 | Rab14          | RAB14    | UP:P61106   | 23897  | 80   | 81   | Y80-p, Y81-p     |
| 689 | Rab18          | RAB18    | UP:Q9NP72   | 22977  | 77   | 78   | Y77-p, Y78-p     |
| 690 | Rab1A          | RAB1A    | UP:P62820   | 22678  | 80   | 81   | Y80-p, Y81-p     |
| 691 | RAB1B          | RAB1B    | UP:Q9H0U4   | 22171  | 77   | 78   | Y77-p, Y78-p     |
| 692 | Rab3c          | RAB3C    | UP:Q96E17   | 25952  | 99   | 100  | Y99-p, Y100-p    |
| 693 | RAB8A          | RAB8A    | UP:P61006   | 23668  | 77   | 78   | Y77-p, Y78-p     |
| 694 | RAB9A          | RAB9A    | UP:P51151   | 22838  | 107  | 108  | Y107-p, Y108-p   |

## Supplementary Information

|     |             |          |           |        |      |      |                  |
|-----|-------------|----------|-----------|--------|------|------|------------------|
| 695 | RADIL       | RADIL    | UP:Q96JH8 | 117455 | 350  | 351  | Y350-p, Y351-p   |
| 696 | RAF1        | RAF1     | UP:P04049 | 73052  | 340  | 341  | Y340-p, Y341-p   |
| 697 | RAI1        | RAI1     | UP:Q7Z5J4 | 203352 | 50   | 51   | Y50-p, Y51-p     |
| 698 | RAN         | RAN      | UP:P62826 | 24423  | 146  | 147  | Y146-p, Y147-p   |
| 699 | Rb-like 1   | RBL1     | UP:P28749 | 120847 | 468  | 469  | Y468-p, Y469-p   |
| 700 | RBM15B      | RBM15B   | UP:Q8NDT2 | 97205  | 306  | 307  | Y306-p, Y307-p   |
| 701 | RBM22       | RBM22    | UP:Q9NW64 | 46896  | 116  | 117  | Y116-p, Y117-p   |
| 702 | RBM22       | RBM22    | UP:Q9NW64 | 46896  | 156  | 157  | Y156-p, Y157-p   |
| 703 | RBM3        | RBM3     | UP:P98179 | 17170  | 117  | 118  | Y117-p, Y118-p   |
| 704 | RBM4        | RBM4     | UP:Q9BWF3 | 40314  | 210  | 211  | Y210-p, Y211-p   |
| 705 | RBM4        | RBM4     | UP:Q9BWF3 | 40314  | 221  | 222  | Y221-p, Y222-p   |
| 706 | RBMS1       | RBMS1    | UP:P29558 | 44505  | 16   | 17   | Y16-p, Y17-p     |
| 707 | RC3H1       | RC3H1    | UP:Q5TC82 | 125736 | 592  | 593  | Y592-p, Y593-p   |
| 708 | RCL1        | RCL1     | UP:Q9Y2P8 | 40843  | 74   | 75   | Y74-p, Y75-p     |
| 709 | RCOR3       | RCOR3    | UP:Q9P2K3 | 55581  | 126  | 127  | Y126-p, Y127-p   |
| 710 | RCOR3       | RCOR3    | UP:Q9P2K3 | 55581  | 127  | 128  | Y127-p, Y128-p   |
| 711 | reelin      | RELN     | UP:P78509 | 388388 | 29   | 30   | Y29-p, Y30-p     |
| 712 | REL         | REL      | UP:Q04864 | 68520  | 88   | 89   | Y88-p, Y89-p     |
| 713 | RENT1       | UPF1     | UP:Q92900 | 124345 | 113  | 114  | Y113-p, Y114-p   |
| 714 | REV3        | REV3L    | UP:O60673 | 352776 | 2984 | 2985 | Y2984-p, Y2985-p |
| 715 | RFK         | RFK      | UP:Q969G6 | 17623  | 70   | 71   | Y70-p, Y71-p     |
| 716 | RFX4        | RFX4     | UP:Q33E94 | 83368  | 129  | 130  | Y129-p, Y130-p   |
| 717 | RGPD1       | RGPD1    | UP:P0DJD0 | 196662 | 27   | 28   | Y27-p, Y28-p     |
| 718 | RGPD2       | RGPD2    | UP:P0DJD1 | 197308 | 35   | 36   | Y35-p, Y36-p     |
| 719 | RGPD3       | RGPD3    | UP:A6NKT7 | 197487 | 36   | 37   | Y36-p, Y37-p     |
| 720 | RGPD4       | RGPD4    | UP:Q7Z3J3 | 197289 | 36   | 37   | Y36-p, Y37-p     |
| 721 | RHBDD1      | RHBDD1   | UP:Q8TEB9 | 35823  | 245  | 246  | Y245-p, Y246-p   |
| 722 | RIAM        | APBB1IP  | UP:Q7Z5R6 | 73183  | 340  | 341  | Y340-p, Y341-p   |
| 723 | RILPL1      | RILPL1   | UP:Q5EBL4 | 47108  | 322  | 323  | Y322-p, Y323-p   |
| 724 | RIT1        | RIT1     | UP:Q92963 | 25145  | 169  | 170  | Y169-p, Y170-p   |
| 725 | RNAseT2     | RNASET2  | UP:O00584 | 29481  | 162  | 163  | Y162-p, Y163-p   |
| 726 | RNF139      | RNF139   | UP:Q8WU17 | 75994  | 449  | 450  | Y449-p, Y450-p   |
| 727 | RNF17       | RNF17    | UP:Q9BXT8 | 184643 | 86   | 87   | Y86-p, Y87-p     |
| 728 | ROCK1       | ROCK1    | UP:Q13464 | 158175 | 603  | 604  | Y603-p, Y604-p   |
| 729 | ROCK2       | ROCK2    | UP:O75116 | 160900 | 1318 | 1319 | Y1318-p, Y1319-p |
| 730 | Ron         | MST1R    | UP:Q04912 | 152271 | 1238 | 1239 | Y1238-p, Y1239-p |
| 731 | ROS         | ROS1     | UP:P08922 | 263915 | 2114 | 2115 | Y2114-p, Y2115-p |
| 732 | RPL5        | RPL5     | UP:P46777 | 34363  | 30   | 31   | Y30-p, Y31-p     |
| 733 | RPP40       | RPP40    | UP:O75818 | 41834  | 37   | 38   | Y37-p, Y38-p     |
| 734 | RPS11       | RPS11    | UP:P62280 | 18431  | 36   | 37   | Y36-p, Y37-p     |
| 735 | RPS3        | RPS3     | UP:P23396 | 26688  | 166  | 167  | Y166-p, Y167-p   |
| 736 | RPT3        | PSMC4    | UP:P43686 | 47366  | 111  | 112  | Y111-p, Y112-p   |
| 737 | RRM1        | RRM1     | UP:P23921 | 90070  | 485  | 486  | Y485-p, Y486-p   |
| 738 | RTEL1       | RTEL1    | UP:Q9NZ71 | 133683 | 209  | 210  | Y209-p, Y210-p   |
| 739 | RYR2        | RYR2     | UP:Q92736 | 564567 | 1427 | 1428 | Y1427-p, Y1428-p |
| 740 | Sam68       | KHDRBS1  | UP:Q07666 | 48227  | 396  | 397  | Y396-p, Y397-p   |
| 741 | SAMD4       | SAMD4A   | UP:Q9UPU9 | 79415  | 176  | 177  | Y176-p, Y177-p   |
| 742 | SAS10       | UTP3     | UP:Q9NQZ2 | 54558  | 43   | 44   | Y43-p, Y44-p     |
| 743 | SAS10       | UTP3     | UP:Q9NQZ2 | 54558  | 136  | 137  | Y136-p, Y137-p   |
| 744 | SAT         | SAT1     | UP:P21673 | 20024  | 77   | 78   | Y77-p, Y78-p     |
| 745 | SCFD1       | SCFD1    | UP:Q8WVM8 | 72380  | 114  | 115  | Y114-p, Y115-p   |
| 746 | SCGN        | SCGN     | UP:O76038 | 32040  | 208  | 209  | Y208-p, Y209-p   |
| 747 | SCN10A      | SCN10A   | UP:Q9Y5Y9 | 220626 | 723  | 724  | Y723-p, Y724-p   |
| 748 | SCN5A       | SCN5A    | UP:Q14524 | 226940 | 1494 | 1495 | Y1494-p, Y1495-p |
| 749 | SEC11L3     | SEC11C   | UP:Q9BY50 | 21542  | 31   | 32   | Y31-p, Y32-p     |
| 750 | SEC13       | SEC13    | UP:P55735 | 35541  | 23   | 24   | Y23-p, Y24-p     |
| 751 | SEC16A      | SEC16A   | UP:O15027 | 233517 | 1064 | 1065 | Y1064-p, Y1065-p |
| 752 | SEC16A iso7 | SEC16A   | UP:J3KNL6 | 251894 | 1242 | 1243 | Y1242-p, Y1243-p |
| 753 | SEC16B      | SEC16B   | UP:Q96JE7 | 116604 | 125  | 126  | Y125-p, Y126-p   |
| 754 | SEL1L3      | SEL1L3   | UP:Q68CR1 | 128567 | 447  | 448  | Y447-p, Y448-p   |
| 755 | SEMA4A      | SEMA4A   | UP:Q9H3S1 | 83574  | 44   | 45   | Y44-p, Y45-p     |
| 756 | SEMA4C      | SEMA4C   | UP:Q9C0C4 | 92623  | 736  | 737  | Y736-p, Y737-p   |
| 757 | SERPINA4    | SERPINA4 | UP:P29622 | 48542  | 63   | 64   | Y63-p, Y64-p     |
| 758 | SERPINH1    | SERPINH1 | UP:P50454 | 46441  | 245  | 246  | Y245-p, Y246-p   |



## Supplementary Information

|     |           |          |             |        |      |      |                  |
|-----|-----------|----------|-------------|--------|------|------|------------------|
| 759 | SETD1A    | SETD1A   | UP:Q15047   | 186034 | 179  | 180  | Y179-p, Y180-p   |
| 760 | SETD2     | SETD2    | UP:Q9BYW2   | 287597 | 427  | 428  | Y427-p, Y428-p   |
| 761 | SETDB1    | SETDB1   | UP:Q15047   | 143157 | 677  | 678  | Y677-p, Y678-p   |
| 762 | SF3B1     | SF3B1    | UP:O75533   | 145830 | 38   | 39   | Y38-p, Y39-p     |
| 763 | SF3B2     | SF3B2    | UP:Q13435   | 100228 | 591  | 592  | Y591-p, Y592-p   |
| 764 | SF11      | SF11     | UP:A8K8P3   | 147664 | 733  | 734  | Y733-p, Y734-p   |
| 765 | SFRS10    | TRA2B    | UP:P62995   | 33666  | 221  | 222  | Y221-p, Y222-p   |
| 766 | SFRS10    | TRA2B    | UP:P62995   | 33666  | 235  | 236  | Y235-p, Y236-p   |
| 767 | SFRS10    | TRA2B    | UP:P62995   | 33666  | 268  | 269  | Y268-p, Y269-p   |
| 768 | SFRS2IP   | SCAF11   | UP:Q99590   | 164652 | 1161 | 1162 | Y1161-p, Y1162-p |
| 769 | SFRS3     | SRSF3    | UP:P84103   | 19330  | 32   | 33   | Y32-p, Y33-p     |
| 770 | SFRS7     | SRSF7    | UP:Q16629   | 27367  | 33   | 34   | Y33-p, Y34-p     |
| 771 | SFRS8     | SFSWAP   | UP:Q12872   | 104822 | 252  | 253  | Y252-p, Y253-p   |
| 772 | SgK269    | PEAK1    | UP:Q9H792   | 193106 | 1371 | 1372 | Y1371-p, Y1372-p |
| 773 | SGSM1     | SGSM1    | UP:Q2NKQ1   | 129718 | 154  | 155  | Y154-p, Y155-p   |
| 774 | SH2BP1    | CTR9     | UP:Q6PD62   | 133502 | 92   | 93   | Y92-p, Y93-p     |
| 775 | SH3PXD2B  | SH3PXD2B | UP:A1X283   | 101579 | 373  | 374  | Y373-p, Y374-p   |
| 776 | SHARP     | SPEN     | UP:Q96T58   | 402248 | 183  | 184  | Y183-p, Y184-p   |
| 777 | SHARP     | SPEN     | UP:Q96T58   | 402248 | 632  | 633  | Y632-p, Y633-p   |
| 778 | Shb       | SHB      | UP:Q15464   | 55042  | 484  | 485  | Y484-p, Y485-p   |
| 779 | Shc1      | SHC1     | UP:P29353   | 62822  | 349  | 350  | Y349-p, Y350-p   |
| 780 | Shc1 iso2 | SHC1     | UP:P29353-2 | 51611  | 239  | 240  | Y239-p, Y240-p   |
| 781 | Shc1 iso3 | SHC1     | UP:P29353-3 | 46668  | 194  | 195  | Y194-p, Y195-p   |
| 782 | Shc2      | SHC2     | UP:P98077   | 61916  | 338  | 339  | Y338-p, Y339-p   |
| 783 | Shc3      | SHC3     | UP:Q92529   | 64056  | 341  | 342  | Y341-p, Y342-p   |
| 784 | Shc3      | SHC3     | UP:Q92529   | 64056  | 379  | 380  | Y379-p, Y380-p   |
| 785 | Shc3 iso2 | SHC3     | UP:Q92529-2 | 51939  | 218  | 219  | Y218-p, Y219-p   |
| 786 | Shc3 iso2 | SHC3     | UP:Q92529-2 | 51939  | 256  | 257  | Y256-p, Y257-p   |
| 787 | Shc4      | SHC4     | UP:Q655L8   | 68785  | 374  | 375  | Y374-p, Y375-p   |
| 788 | SHE       | SHE      | UP:Q5VZ18   | 53950  | 470  | 471  | Y470-p, Y471-p   |
| 789 | SHIP-2    | INPPL1   | UP:O15357   | 138599 | 986  | 987  | Y986-p, Y987-p   |
| 790 | SHP-1     | PTPN6    | UP:P29350   | 67561  | 213  | 214  | Y213-p, Y214-p   |
| 791 | SHP-2     | PTPN11   | UP:Q06124   | 68436  | 62   | 63   | Y62-p, Y63-p     |
| 792 | SIN3A     | SIN3A    | UP:Q96ST3   | 145175 | 958  | 959  | Y958-p, Y959-p   |
| 793 | SKAP55    | SKAP1    | UP:Q86WV1   | 41432  | 141  | 142  | Y141-p, Y142-p   |
| 794 | SKAP55    | SKAP1    | UP:Q86WV1   | 41432  | 142  | 143  | Y142-p, Y143-p   |
| 795 | SKAP55    | SKAP1    | UP:Q86WV1   | 41432  | 298  | 299  | Y298-p, Y299-p   |
| 796 | SKI2W     | SKIV2L   | UP:Q15477   | 137755 | 518  | 519  | Y518-p, Y519-p   |
| 797 | SKT       | KIAA1217 | UP:Q5T5P2   | 214116 | 244  | 245  | Y244-p, Y245-p   |
| 798 | SLC15A2   | SLC15A2  | UP:Q16348   | 81783  | 60   | 61   | Y60-p, Y61-p     |
| 799 | SLC26A2   | SLC26A2  | UP:P50443   | 81662  | 588  | 589  | Y588-p, Y589-p   |
| 800 | SLC27A1   | SLC27A1  | UP:Q6PCB7   | 71108  | 266  | 267  | Y266-p, Y267-p   |
| 801 | SLC27A4   | SLC27A4  | UP:Q6P1M0   | 72064  | 263  | 264  | Y263-p, Y264-p   |
| 802 | SLC35F3   | SLC35F3  | UP:Q8IY50   | 46817  | 115  | 116  | Y115-p, Y116-p   |
| 803 | SLC38A9   | SLC38A9  | UP:Q8NBW4   | 63776  | 70   | 71   | Y70-p, Y71-p     |
| 804 | SLC40A1   | SLC40A1  | UP:Q9NP59   | 62542  | 302  | 303  | Y302-p, Y303-p   |
| 805 | SLC45A4   | SLC45A4  | UP:Q5BKX6   | 83878  | 429  | 430  | Y429-p, Y430-p   |
| 806 | SLC4A5    | SLC4A5   | UP:Q9BY07   | 126255 | 662  | 663  | Y662-p, Y663-p   |
| 807 | SLC7A14   | SLC7A14  | UP:Q8TBB6   | 84052  | 730  | 731  | Y730-p, Y731-p   |
| 808 | SLC9A11   | SLC9C2   | UP:Q5TAH2   | 129053 | 645  | 646  | Y645-p, Y646-p   |
| 809 | SMC3      | SMC3     | UP:Q9UQE7   | 141542 | 668  | 669  | Y668-p, Y669-p   |
| 810 | SMG1      | SMG1     | UP:Q96Q15   | 410501 | 2253 | 2254 | Y2253-p, Y2254-p |
| 811 | SMG8      | SMG8     | UP:Q8ND04   | 109684 | 141  | 142  | Y141-p, Y142-p   |
| 812 | SMRT      | NCOR2    | UP:Q9Y618   | 274804 | 332  | 333  | Y332-p, Y333-p   |
| 813 | SNIP1     | SNIP1    | UP:Q8TAD8   | 45778  | 349  | 350  | Y349-p, Y350-p   |
| 814 | snRNP C   | SNRPC    | UP:P09234   | 17394  | 37   | 38   | Y37-p, Y38-p     |
| 815 | SOCS3     | SOCS3    | UP:O14543   | 24770  | 165  | 166  | Y165-p, Y166-p   |
| 816 | SPANXN2   | SPANXN2  | UP:Q5MJ10   | 19917  | 56   | 57   | Y56-p, Y57-p     |
| 817 | SPATA13   | SPATA13  | UP:Q96N96   | 74820  | 497  | 498  | Y497-p, Y498-p   |
| 818 | SPATA17   | SPATA17  | UP:Q96L03   | 43499  | 83   | 84   | Y83-p, Y84-p     |
| 819 | SPATA17   | SPATA17  | UP:Q96L03   | 43499  | 115  | 116  | Y115-p, Y116-p   |
| 820 | SPATA2    | SPATA2   | UP:Q9UM82   | 58427  | 242  | 243  | Y242-p, Y243-p   |
| 821 | SPATA22   | SPATA22  | UP:Q8NHS9   | 41318  | 279  | 280  | Y279-p, Y280-p   |
| 822 | SPG20     | SPG20    | UP:Q8N0X7   | 72833  | 45   | 46   | Y45-p, Y46-p     |
| 823 | SPP2      | SPP2     | UP:Q13103   | 24338  | 109  | 110  | Y109-p, Y110-p   |
| 824 | SPT5      | SUPT5H   | UP:O00267   | 121000 | 140  | 141  | Y140-p, Y141-p   |
| 825 | Srcasm    | TOM1L1   | UP:O75674   | 52989  | 441  | 442  | Y441-p, Y442-p   |
| 826 | SSB       | SSB      | UP:P05455   | 46837  | 23   | 24   | Y23-p, Y24-p     |

## Supplementary Information

|     |             |          |           |         |       |       |                       |
|-----|-------------|----------|-----------|---------|-------|-------|-----------------------|
| 827 | SSUH2       | SSUH2    | UP:Q9Y2M2 | 39845   | 328   | 329   | Y328-p, Y329-p        |
| 828 | STAG1       | STAG1    | UP:Q8WVM7 | 144427  | 896   | 897   | Y896-p, Y897-p        |
| 829 | STAG2       | STAG2    | UP:Q8N3U4 | 141326  | 892   | 893   | Y892-p, Y893-p        |
| 830 | STAT5A      | STAT5A   | UP:P42229 | 90647   | 682   | 683   | Y682-p, Y683-p        |
| 831 | STAT5B      | STAT5B   | UP:P51692 | 89866   | 682   | 683   | Y682-p, Y683-p        |
| 832 | stomatin    | STOM     | UP:P27105 | 31731   | 123   | 124   | Y123-p, Y124-p        |
| 833 | STOX1       | STOX1    | UP:Q6ZVD7 | 110962  | 857   | 858   | Y857-p, Y858-p        |
| 834 | SUGT1       | SUGT1    | UP:Q9Y2Z0 | 41024   | 47    | 48    | Y47-p, Y48-p          |
| 835 | SV2A        | SV2A     | UP:Q7L0J3 | 82695   | 65    | 66    | Y65-p, Y66-p          |
| 836 | SV2B        | SV2B     | UP:Q7L1I2 | 77444   | 19    | 20    | Y19-p, Y20-p          |
| 837 | Syk         | SYK      | UP:P43405 | 72066   | 525   | 526   | Y525-p, Y526-p        |
| 838 | Syk         | SYK      | UP:P43405 | 72066   | 629   | 630   | Y629-p, Y630-p        |
| 839 | Syk         | SYK      | UP:P43405 | 72066   | 630   | 631   | Y630-p, Y631-p        |
| 840 | SYT11       | SYT11    | UP:Q9BT88 | 48297   | 337   | 338   | Y337-p, Y338-p        |
| 841 | SYTL2 iso17 | SYTL2    | UP:J3KP28 | 197903  | 447   | 448   | Y447-p, Y448-p        |
| 842 | TAF1        | TAF1     | UP:P21675 | 212677  | 888   | 889   | Y888-p, Y889-p        |
| 843 | TAF1B       | TAF1B    | UP:Q53T94 | 68832   | 434   | 435   | Y434-p, Y435-p        |
| 844 | TAK1        | MAP3K7   | UP:O43318 | 67196   | 584   | 585   | Y584-p, Y585-p        |
| 845 | Talin-1     | TLN1     | UP:Q9Y490 | 269767  | 70    | 71    | Y70-p, Y71-p          |
| 846 | TANC2       | TANC2    | UP:Q9HCD6 | 219650  | 1725  | 1726  | Y1725-p,<br>Y1726-p   |
| 847 | TANC2       | TANC2    | UP:Q9HCD6 | 219650  | 1919  | 1920  | Y1919-p,<br>Y1920-p   |
| 848 | TARBP1      | TARBP1   | UP:Q13395 | 181675  | 1159  | 1160  | Y1159-p,<br>Y1160-p   |
| 849 | TBC1D10A    | TBC1D10A | UP:Q9BXI6 | 57118   | 230   | 231   | Y230-p, Y231-p        |
| 850 | TBC1D2B     | TBC1D2B  | UP:Q9UPU7 | 109880  | 787   | 788   | Y787-p, Y788-p        |
| 851 | TBC1D5      | TBC1D5   | UP:Q92609 | 89004   | 431   | 432   | Y431-p, Y432-p        |
| 852 | TBC1D7      | TBC1D7   | UP:Q9PON9 | 33972   | 13    | 14    | Y13-p, Y14-p          |
| 853 | TCF12       | TCF12    | UP:Q99081 | 72965   | 156   | 157   | Y156-p, Y157-p        |
| 854 | TCF3        | TCF7L1   | UP:Q9HCS4 | 62631   | 395   | 396   | Y395-p, Y396-p        |
| 855 | TCF7        | TCF7     | UP:P36402 | 41642   | 318   | 319   | Y318-p, Y319-p        |
| 856 | TCF7L2      | TCF7L2   | UP:Q9NQ80 | 67919   | 399   | 400   | Y399-p, Y400-p        |
| 857 | TCP11       | TCP11    | UP:Q8WVU5 | 56141   | 68    | 69    | Y68-p, Y69-p          |
| 858 | TDRD6       | TDRD6    | UP:O60522 | 236517  | 552   | 553   | Y552-p, Y553-p        |
| 859 | TDRD7       | TDRD7    | UP:Q8NHU6 | 123586  | 501   | 502   | Y501-p, Y502-p        |
| 860 | Tel         | ETV6     | UP:P41212 | 53000   | 401   | 402   | Y401-p, Y402-p        |
| 861 | TF          | TF       | UP:P02787 | 77064   | 533   | 534   | Y533-p, Y534-p        |
| 862 | TFIP11      | TFIP11   | UP:Q9UBB9 | 96820   | 279   | 280   | Y279-p, Y280-p        |
| 863 | THEMIS      | THEMIS   | UP:Q8N1K5 | 73452   | 540   | 541   | Y540-p, Y541-p        |
| 864 | THUMPD3     | THUMPD3  | UP:Q9BV44 | 57003   | 187   | 188   | Y187-p, Y188-p        |
| 865 | Titin       | TTN      | UP:Q8WZ42 | 3816030 | 18665 | 18666 | Y18665-p,<br>Y18666-p |
| 866 | Titin       | TTN      | UP:Q8WZ42 | 3816030 | 18997 | 18998 | Y18997-p,<br>Y18998-p |
| 867 | Titin       | TTN      | UP:Q8WZ42 | 3816030 | 19695 | 19696 | Y19695-p,<br>Y19696-p |
| 868 | Titin       | TTN      | UP:Q8WZ42 | 3816030 | 19895 | 19896 | Y19895-p,<br>Y19896-p |
| 869 | Titin       | TTN      | UP:Q8WZ42 | 3816030 | 22948 | 22949 | Y22948-p,<br>Y22949-p |
| 870 | Titin       | TTN      | UP:Q8WZ42 | 3816030 | 24030 | 24031 | Y24030-p,<br>Y24031-p |
| 871 | Titin       | TTN      | UP:Q8WZ42 | 3816030 | 24837 | 24838 | Y24837-p,<br>Y24838-p |
| 872 | Titin       | TTN      | UP:Q8WZ42 | 3816030 | 26195 | 26196 | Y26195-p,<br>Y26196-p |
| 873 | Titin       | TTN      | UP:Q8WZ42 | 3816030 | 27274 | 27275 | Y27274-p,<br>Y27275-p |
| 874 | Titin       | TTN      | UP:Q8WZ42 | 3816030 | 28165 | 28166 | Y28165-p,<br>Y28166-p |
| 875 | Titin       | TTN      | UP:Q8WZ42 | 3816030 | 29445 | 29446 | Y29445-p,<br>Y29446-p |
| 876 | Titin       | TTN      | UP:Q8WZ42 | 3816030 | 31291 | 31292 | Y31291-p,<br>Y31292-p |
| 877 | Titin       | TTN      | UP:Q8WZ42 | 3816030 | 31565 | 31566 | Y31565-p,<br>Y31566-p |
| 878 | Titin       | TTN      | UP:Q8WZ42 | 3816030 | 31721 | 31722 | Y31721-p,<br>Y31722-p |
| 879 | Titin       | TTN      | UP:Q8WZ42 | 3816030 | 32594 | 32595 | Y32594-p,<br>Y32595-p |
| 880 | Titin       | TTN      | UP:Q8WZ42 | 3816030 | 33006 | 33007 | Y33006-p,             |

## Supplementary Information

|     |             |           |             |        |      |      |                     |
|-----|-------------|-----------|-------------|--------|------|------|---------------------|
|     |             |           |             |        |      |      | Y33007-p            |
| 881 | TM9SF2      | TM9SF2    | UP:Q99805   | 75776  | 217  | 218  | Y217-p, Y218-p      |
| 882 | TM9SF4      | TM9SF4    | UP:Q92544   | 74519  | 188  | 189  | Y188-p, Y189-p      |
| 883 | TMC6        | TMC6      | UP:Q7Z403   | 90045  | 101  | 102  | Y101-p, Y102-p      |
| 884 | TMEM119     | TMEM119   | UP:Q4V9L6   | 29203  | 127  | 128  | Y127-p, Y128-p      |
| 885 | TMEM123     | TMEM123   | UP:Q8N131   | 21531  | 190  | 191  | Y190-p, Y191-p      |
| 886 | TMPRSS2     | TMPRSS2   | UP:O15393   | 53859  | 44   | 45   | Y44-p, Y45-p        |
| 887 | TMTC4       | TMTC4     | UP:Q5T4D3   | 82991  | 587  | 588  | Y587-p, Y588-p      |
| 888 | TPX2        | TPX2      | UP:Q9ULW0   | 85653  | 81   | 82   | Y81-p, Y82-p        |
| 889 | TRA2A       | TRA2A     | UP:Q13595   | 32689  | 264  | 265  | Y264-p, Y265-p      |
| 890 | Trap150     | THRAP3    | UP:Q9Y2W1   | 108666 | 880  | 881  | Y880-p, Y881-p      |
| 891 | TRIM16      | TRIM16    | UP:O95361   | 63955  | 429  | 430  | Y429-p, Y430-p      |
| 892 | TRIM16L     | TRIM16L   | UP:Q309B1   | 40306  | 213  | 214  | Y213-p, Y214-p      |
| 893 | TRIM23      | TRIM23    | UP:P36406   | 64067  | 468  | 469  | Y468-p, Y469-p      |
| 894 | TrkA        | NTRK1     | UP:P04629   | 87497  | 680  | 681  | Y680-p, Y681-p      |
| 895 | TrkA iso2   | NTRK1     | UP:P04629-2 | 86880  | 674  | 675  | Y674-p, Y675-p      |
| 896 | TrkB        | NTRK2     | UP:Q16620   | 91999  | 706  | 707  | Y706-p, Y707-p      |
| 897 | TrkC        | NTRK3     | UP:Q16288   | 94428  | 709  | 710  | Y709-p, Y710-p      |
| 898 | TRM1L       | TRMT1L    | UP:Q7Z2T5   | 81747  | 426  | 427  | Y426-p, Y427-p      |
| 899 | TRS85       | TRAPPC8   | UP:Q9Y2L5   | 160997 | 192  | 193  | Y192-p, Y193-p      |
| 900 | TTC15       | TRAPPC12  | UP:Q8WVT3   | 79375  | 574  | 575  | Y574-p, Y575-p      |
| 901 | TTC18       | TTC18     | UP:Q5TON1   | 125721 | 529  | 530  | Y529-p, Y530-p      |
| 902 | TTC8        | TTC8      | UP:Q8TAM2   | 61534  | 261  | 262  | Y261-p, Y262-p      |
| 903 | TTRAP       | TDP2      | UP:O95551   | 40930  | 157  | 158  | Y157-p, Y158-p      |
| 904 | TUBB        | TUBB      | UP:P07437   | 49671  | 50   | 51   | Y50-p, Y51-p        |
| 905 | TUBB2C      | TUBB4B    | UP:P68371   | 49831  | 50   | 51   | Y50-p, Y51-p        |
| 906 | TULP2       | TULP2     | UP:O00295   | 58664  | 305  | 306  | Y305-p, Y306-p      |
| 907 | Tyk2        | TYK2      | UP:P29597   | 133650 | 1054 | 1055 | Y1054-p,<br>Y1055-p |
| 908 | Tyro3       | TYRO3     | UP:Q06418   | 96905  | 685  | 686  | Y685-p, Y686-p      |
| 909 | TyroBP      | TYROBP    | UP:O43914   | 12179  | 111  | 112  | Y111-p, Y112-p      |
| 910 | TyroBP iso2 | TYROBP    | UP:O43914-2 | 12108  | 110  | 111  | Y110-p, Y111-p      |
| 911 | UBAP2       | UBAP2     | UP:Q5T6F2   | 117116 | 839  | 840  | Y839-p, Y840-p      |
| 912 | UBR4        | UBR4      | UP:Q5T4S7   | 573841 | 1001 | 1002 | Y1001-p,<br>Y1002-p |
| 913 | UBR7        | UBR7      | UP:Q8N806   | 47999  | 422  | 423  | Y422-p, Y423-p      |
| 914 | UGCGL1      | UGGT1     | UP:Q9NYU2   | 177190 | 98   | 99   | Y98-p, Y99-p        |
| 915 | UHRF1BP1L   | UHRF1BP1L | UP:A0JNW5   | 164199 | 362  | 363  | Y362-p, Y363-p      |
| 916 | UHRF1BP1L   | UHRF1BP1L | UP:A0JNW5   | 164199 | 772  | 773  | Y772-p, Y773-p      |
| 917 | UNK         | UNK       | UP:Q9COB0   | 88084  | 236  | 237  | Y236-p, Y237-p      |
| 918 | UQCRC1      | UQCRC1    | UP:P31930   | 52646  | 131  | 132  | Y131-p, Y132-p      |
| 919 | URG4        | URGCP     | UP:Q8TCY9   | 104987 | 383  | 384  | Y383-p, Y384-p      |
| 920 | USP10       | USP10     | UP:Q14694   | 87134  | 159  | 160  | Y159-p, Y160-p      |
| 921 | USP11       | USP11     | UP:P51784   | 109817 | 607  | 608  | Y607-p, Y608-p      |
| 922 | USP24       | USP24     | UP:Q9UPU5   | 294365 | 2157 | 2158 | Y2157-p,<br>Y2158-p |
| 923 | USP25       | USP25     | UP:Q9UHP3   | 122218 | 69   | 70   | Y69-p, Y70-p        |
| 924 | USP4        | USP4      | UP:Q13107   | 108565 | 750  | 751  | Y750-p, Y751-p      |
| 925 | USP40       | USP40     | UP:Q9NVE5   | 140130 | 1156 | 1157 | Y1156-p,<br>Y1157-p |
| 926 | USP47       | USP47     | UP:Q96K76   | 157311 | 504  | 505  | Y504-p, Y505-p      |
| 927 | USP50       | USP50     | UP:Q70EL3   | 38955  | 24   | 25   | Y24-p, Y25-p        |
| 928 | USP9X       | USP9X     | UP:Q93008   | 292280 | 367  | 368  | Y367-p, Y368-p      |
| 929 | USP9Y       | USP9Y     | UP:O00507   | 291077 | 368  | 369  | Y368-p, Y369-p      |
| 930 | UTP11L      | UTP11L    | UP:Q9Y3A2   | 30447  | 67   | 68   | Y67-p, Y68-p        |
| 931 | VANGL1      | VANGL1    | UP:Q8TAA9   | 59975  | 344  | 345  | Y344-p, Y345-p      |
| 932 | VANGL2      | VANGL2    | UP:Q9ULK5   | 59714  | 341  | 342  | Y341-p, Y342-p      |
| 933 | VANGL2      | VANGL2    | UP:Q9ULK5   | 59714  | 342  | 343  | Y342-p, Y343-p      |
| 934 | VEGFR3      | FLT4      | UP:P35916   | 152757 | 1230 | 1231 | Y1230-p,<br>Y1231-p |
| 935 | VPS13B      | VPS13B    | UP:Q7Z7G8   | 448664 | 2100 | 2101 | Y2100-p,<br>Y2101-p |
| 936 | VRTN        | VRTN      | UP:Q9H8Y1   | 78260  | 436  | 437  | Y436-p, Y437-p      |
| 937 | WBP2        | WBP2      | UP:Q969T9   | 28087  | 231  | 232  | Y231-p, Y232-p      |
| 938 | WBP2        | WBP2      | UP:Q969T9   | 28087  | 252  | 253  | Y252-p, Y253-p      |
| 939 | WDR49       | WDR49     | UP:Q8IV35   | 79295  | 600  | 601  | Y600-p, Y601-p      |
| 940 | WNT7B       | WNT7B     | UP:P56706   | 39327  | 140  | 141  | Y140-p, Y141-p      |
| 941 | WSCD1       | WSCD1     | UP:Q658N2   | 65694  | 382  | 383  | Y382-p, Y383-p      |
| 942 | XPNPEP2     | XPNPEP2   | UP:O43895   | 75625  | 617  | 618  | Y617-p, Y618-p      |
| 943 | XRN2        | XRN2      | UP:Q9H0D6   | 108582 | 176  | 177  | Y176-p, Y177-p      |
| 944 | XXYL1       | XXYL1     | UP:Q8N8I6   | 43807  | 39   | 40   | Y39-p, Y40-p        |

## Supplementary Information

|     |         |         |           |        |      |      |                  |
|-----|---------|---------|-----------|--------|------|------|------------------|
| 945 | YB-1    | YBX1    | UP:P67809 | 35924  | 196  | 197  | Y196-p, Y197-p   |
| 946 | Yes     | YES1    | UP:P07947 | 60801  | 222  | 223  | Y222-p, Y223-p   |
| 947 | ZAP70   | ZAP70   | UP:P43403 | 69872  | 492  | 493  | Y492-p, Y493-p   |
| 948 | ZAP70   | ZAP70   | UP:P43403 | 69872  | 597  | 598  | Y597-p, Y598-p   |
| 949 | ZC3H14  | ZC3H14  | UP:Q6PJT7 | 82876  | 453  | 454  | Y453-p, Y454-p   |
| 950 | ZC3H18  | ZC3H18  | UP:Q86VM9 | 106378 | 371  | 372  | Y371-p, Y372-p   |
| 951 | ZDHHC23 | ZDHHC23 | UP:Q8IYP9 | 45983  | 153  | 154  | Y153-p, Y154-p   |
| 952 | ZNF462  | ZNF462  | UP:Q96JM2 | 284688 | 1725 | 1726 | Y1725-p, Y1726-p |
| 953 | ZNF484  | ZNF484  | UP:Q5JVG2 | 98221  | 327  | 328  | Y327-p, Y328-p   |
| 954 | ZO1     | TJP1    | UP:Q07157 | 195459 | 1354 | 1355 | Y1354-p, Y1355-p |
| 955 | ZO2     | TJP2    | UP:Q9UDY2 | 133958 | 1178 | 1179 | Y1178-p, Y1179-p |
| 956 | ZP4     | ZP4     | UP:Q12836 | 59400  | 330  | 331  | Y330-p, Y331-p   |

The information in the table was extracted from the data published in the online database PhosphoSitePlus® ([www.phosphosite.org](http://www.phosphosite.org)), by performing a search for human protein sites containing a pYpY motif.

**Table S2:  $\Delta$  luminescence intensity of  $Tb^{3+}$  in the presence of various analyte\***

| Analyte | mean  | $\pm$ s.d. |
|---------|-------|------------|
| pTApY   | 195.5 | 8.7        |
| pYpY    | 63.2  | 3.6        |
| pY      | 5.9   | 0.1        |
| pTAY    | 2.0   | 0.2        |
| pSpS    | 1.7   | 0.1        |
| ATP     | 1.4   | 0.0        |
| AMP     | 1.3   | 0.0        |
| PPi     | 1.6   | 0.1        |

\* this table provides numerical representation of Figure 1B

**Table S3:  $\Delta$  luminescence intensity of  $Tb^{3+}$  in the presence of various analyte combinations\***

| $Tb^{3+}$ Concentration | Analyte             | $\Delta$ LI | s.d. | $\Delta$ LI (+pTApY) <sup>1</sup> | $\pm$ s.d. | $\Delta$ LI (+pYpY) <sup>1</sup> | $\pm$ s.d. |
|-------------------------|---------------------|-------------|------|-----------------------------------|------------|----------------------------------|------------|
| 50 $\mu$ M              | pYpY                | 30.8        | 1.6  | -                                 | -          | -                                | -          |
|                         | pTApY               | 65.4        | 3.0  | -                                 | -          | -                                | -          |
|                         | BSA                 | 1.8         | 0.6  | 5.7                               | 1.9        | 5.4                              | 0.6        |
|                         | Lysozyme            | 0.4         | 0.0  | 22.3                              | 1.6        | 9.9                              | 0.3        |
|                         | Ovalbumin           | 15.9        | 0.7  | 23.5                              | 2.1        | 15.7                             | 0.7        |
|                         | D- $\alpha$ -casein | 3.6         | 0.6  | 10.3                              | 1.1        | 8.7                              | 1.4        |
|                         | $\beta$ -casein     | 0.8         | 0.1  | 1.1                               | 0.2        | 1.3                              | 0.1        |
| 200 $\mu$ M             | BSA                 | 3.3         | 1.5  | 25.2                              | 0.3        | 16.1                             | 6.5        |
|                         | Lysozyme            | 0.5         | 0.0  | 55.2                              | 4.2        | 39.8                             | 3.2        |

## Supplementary Information

|  |                     |      |     |      |     |      |     |
|--|---------------------|------|-----|------|-----|------|-----|
|  | Ovalbumin           | 7.0  | 1.9 | 75.0 | 3.2 | 39.9 | 2.7 |
|  | D- $\alpha$ -casein | 35.7 | 2.6 | 75.9 | 5.0 | 57.2 | 3.1 |
|  | $\beta$ -casein     | 3.7  | 1.4 | 24.9 | 3.8 | 14.6 | 0.9 |

<sup>1</sup> 40  $\mu$ M of peptide was added to the solutions of all analytes

\* this table provides numerical representation of the data presented in Figure 2

### **Supplementary notes:**

#### **Supplementary note 1: biophysical experiments**

Bovine serum albumin (BSA), lysozyme, ovalbumin, dephosphorylated  $\alpha$ -casein and  $\beta$ -casein proteins were purchased as lyophilized powders from Sigma Aldrich. TbCl<sub>3</sub> (99.0% purity) was purchased from Sigma Aldrich. HEPES free acid was purchased from BioShop Canada (cat. HEP005). ATP, AMP and PPi were purchased from Sigma Aldrich. All peptides were purchased from CanPeptide at 95 % purity.

Full-length sequences for purchased peptides:

pY = Ac-AYpYAA-NH<sub>2</sub>

pYpY = Ac-ApYpYAA-NH<sub>2</sub>

pSpS = Ac-ApSpSAA-NH<sub>2</sub>

pTAY = Ac-ApTAYA-NH<sub>2</sub>

pTApY = Ac-ApTApYA-NH<sub>2</sub>

**Luminescence experiments:** A Tecan Infinite M1000 microplate reader was used for all solution fluorescence intensity measurements at 100 Hz in black 384 well, flat bottom plates, unless otherwise indicated. For 384 well plates a total sample volume of 60  $\mu$ L was used throughout. All time resolved luminescence measurements were taken at a delay time of 60  $\mu$ s and an integration time of 1.5 ms, unless otherwise indicated. All experiments were performed in 50 mM HEPES, 50 mM NaCl buffer, pH 7.5 in triplicate. Tb<sup>3+</sup> and analytes were incubated for 30 min and following this, samples were excited at 263 nm and luminescence intensity was recorded from 450 to 650 nm or at the analytical emission wavelength of 544 nm with the bandwidth of 20 nm.

## Supplementary Information

$\Delta$  luminescence intensity represents the ratio of Tb<sup>3+</sup> luminescence intensity in the presence of analytes and in the absence of lanthanides.

All images were acquired upon excitation with a short-wave UV lamp and captured with a digital camera. Images were taken on black 96 well plates with a total sample volume of 300  $\mu$ L.

The following Hill equation was used for fitting titration data:

$$Y = (V_{\max} * X^n) / (k^n + X^n), \text{ where}$$

Y is the observed luminescence intensity;

V max is the maximum luminescence intensity;

X is the concentration of analyte titrated in;

n is the cooperativity coefficient;

k is the apparent dissociation constant.
